# Changes in Cell Size and Shape During 50,000 Generations of Experimental Evolution with *Escherichia coli*

Nkrumah A. Grant<sup>1,2,3\*</sup>, Ali Abdel Magid<sup>2</sup>, Joshua Franklin<sup>1,2</sup>, Yann Dufour<sup>1,2</sup>, and Richard E. Lenski<sup>1,2,3</sup>

<sup>1</sup> Department of Microbiology and Molecular Genetics, Michigan State University, East Lansing, MI 48824

<sup>2</sup> BEACON Center for the Study of Evolution in Action, Michigan State University, East Lansing, MI 48824

<sup>3</sup> Department of Ecology, Evolutionary Biology, and Behavior Program, Michigan State University, East Lansing, MI 48824

\*Email correspondence to: [Nkrumah.grant88@gmail.com](mailto:Nkrumah.grant88@gmail.com)

1 **Abstract.** Bacteria adopt a wide variety of sizes and shapes, with many species  
2 exhibiting stereotypical morphologies. How morphology changes, and over what  
3 timescales, is less clear. Previous work examining cell morphology in an experiment  
4 with *Escherichia coli* showed that populations evolved larger cells and, in some cases,  
5 cells that were less rod-like. That experiment has now run for over two more decades.  
6 Meanwhile, genome sequence data are available for these populations, and new  
7 computational methods enable high-throughput microscopic analyses. Here, we  
8 measured stationary-phase cell volumes for the ancestor and 12 populations at 2,000,  
9 10,000, and 50,000 generations, including measurements during exponential growth at  
10 the last timepoint. We measured the distribution of cell volumes for each sample using a  
11 Coulter counter and microscopy, the latter of which also provided data on cell shape.  
12 Our data confirm the trend toward larger cells, while also revealing substantial variation  
13 in size and shape across replicate populations. Most populations first evolved wider  
14 cells, but later reverted to the ancestral length-to-width ratio. All but one population  
15 evolved mutations in rod-shape maintenance genes. We also observed many ghost-like  
16 cells in the only population that evolved the novel ability to grow on citrate, supporting  
17 the hypothesis that this lineage struggles with maintaining balanced growth. Lastly, we  
18 show that cell size and fitness remain correlated across 50,000 generations. Our results  
19 suggest larger cells are beneficial in the experimental environment, while the reversion  
20 toward ancestral length-to-width ratios suggests partial compensation for the less  
21 favorable surface area-to-volume ratios of the evolved cells.

22 **Importance.** Bacteria exhibit great morphological diversity, yet we have only a limited  
23 understanding of how their cell sizes and shapes evolve, and of how these features  
24 affect organismal fitness. This knowledge gap reflects, in part, the paucity of the fossil  
25 record for bacteria. Here, we revive and analyze samples extending over 50,000  
26 generations from 12 populations of experimentally evolving *Escherichia coli* to  
27 investigate the relation between cell size, shape, and fitness. Using this “frozen fossil  
28 record” we show that all 12 populations evolved larger cells concomitant with increased  
29 fitness, with substantial heterogeneity in cell size and shape across the replicate lines.  
30 Our work demonstrates that cell morphology can readily evolve and diversify, even  
31 among populations living in identical environments.

32

### 33 **Introduction**

34

35 For well over 100 years, cell biologists have wondered why cells adopt characteristic  
36 shapes (1) and sizes (2). Cell size has been of particular interest owing to its  
37 importance for organismal fitness. For example, cell size influences a bacterium’s  
38 susceptibility to predation by protists (3, 4) and phagocytosis by host immune cells (5,  
39 6). Larger cell size has also been implicated in increasing susceptibility to  
40 bacteriophages (7, 8) and reducing susceptibility to antibiotics (9, 10, 11). Cell size is  
41 generally tightly coupled to growth and division. Most eukaryotic cells follow a four-stage  
42 cycle in which they must reach a critical mass before partitioning into daughter cells  
43 (12). In contrast, the bacterial cell cycle involves less discrete periods due to the

44 overlapping nature of cell growth, DNA replication, chromosome segregation and  
45 division (13). Bacterial cells are generally larger when they are growing faster (14, 15,  
46 16), in order to accommodate more genetic material (17, 13) and ribosomes (18). These  
47 facts suggest that cell size per se is a direct target of selection. However, it has also  
48 been suggested that cell size is a “spandrel” (19), i.e., a phenotypic character that might  
49 appear to be the product of adaptive evolution but is instead merely a byproduct of  
50 natural selection acting on some other trait (20).

51         The distribution of cell size in prokaryotes spans many orders of magnitude (21).  
52 The smallest known bacteria occur in the genus *Palagibacterales*; they constitute 25%  
53 of all marine planktonic cells, and they have average volumes of only ~0.01 fL (1 fL = 1  
54  $\mu\text{m}^3$ ) (22, 23). The largest heterotrophic bacteria, in the genus *Epulopiscium*, live in the  
55 intestines of surgeonfish; they have cytoplasmic volumes of  $\sim 2 \times 10^6$  fL (24, 25). In  
56 contrast to these extremes, the average cell volumes of four widely studied bacteria—  
57 *Bacillus subtilis*, *Staphylococcus aureus*, *Escherichia coli*, and *Caulobacter*  
58 *crescentus*—range between about 0.4 – 3.0 fL (25).

59         Large bacterial cells face significant challenges. Unlike multicellular eukaryotes  
60 that use elaborate vasculature or similar systems to transport nutrients and waste  
61 between cells, along with specialized cells to acquire nutrients from and dispose of  
62 wastes to the environment, bacteria rely on diffusion to grow and reproduce (26, 27,  
63 28). Diffusion must be considered from two perspectives. A cell must first acquire  
64 nutrients from the environment at the cell surface, and those nutrients must then diffuse  
65 internally to their sites of biochemical processing in a timely fashion. As cells grow,

66 volume generally increases faster than surface area, such that the surface area-to-  
67 volume (SA/V) ratio decreases. The SA/V ratio might thus constrain viable cell sizes, as  
68 cells that are too large may be unable to obtain nutrients at a sufficient rate to service  
69 the demands of their biomass. However, bacteria have evolved a number of strategies  
70 that increase their rates of nutrient acquisition for a given cell volume. Rod-shaped cells,  
71 for example, experience a smaller reduction in their SA/V ratio as they grow larger than  
72 do spherical cells. Other examples include various extracellular projections that allow  
73 surface attachment while generating biomechanical motion to refresh the medium in the  
74 cell's immediate environment (29); chemotaxis, which allows cells to move along  
75 gradients of increasing nutrient concentration (30); and invaginated cell envelopes,  
76 which increase the SA/V ratio (31).

77 The surface area of a spherocylindrical (i.e., rod-shaped) cell is given by  $S \approx$   
78  $2\gamma V^{\frac{2}{3}}$ , where  $\gamma = \eta\pi \left(\frac{\eta\pi}{4} - \frac{\pi}{12}\right)^{\frac{2}{3}}$  and  $\eta$  is the aspect ratio, i.e., the cell's length divided  
79 by its width (32). For rod-shaped species like *E. coli*, the SA/V ratio can be varied by  
80 changing either a cell's length or width, while holding the volume constant. Assuming  
81 that the rod shape is maintained, doubling a cell's width reduces its SA/V ratio by much  
82 more than doubling its length (33). If all else were equal, then SA/V considerations  
83 would predict relatively larger cells during nutritional upshifts (resources plentiful) and  
84 smaller cells during nutritional downshifts (resources scarce).

85 Now, suppose a bacterial population resides in a simple environment, one free of  
86 predators and stressors and with a predictable supply of carbon. As this population  
87 adapts to this environment by natural selection, the cells grow slightly faster. Do the

88 cells also become larger, and if so, how much larger? Does cell size constrain the  
89 maximum growth rate that can be achieved, or is the causality in the opposite direction?  
90 If the cells evolve to become larger, are they larger while growing, in stationary phase  
91 when the limiting resource is depleted, or both? And what might change about the  
92 shapes of the cells including their aspect and SA/V ratios?

93         Experimental evolution has proven to be powerful for addressing such questions.  
94 This research framework provides the opportunity to study evolution in real time, both in  
95 biological (34, 35, 36) and digital (37, 38) systems. In the long-term evolution  
96 experiment (LTEE), 12 replicate populations of *E. coli* were started from a common  
97 ancestor and have been propagated by daily serial transfer in a minimal glucose-limited  
98 medium for more than 70,000 generations (32 years). Whole-population samples, and  
99 clones from each population, have been frozen every 500 generations, creating a frozen  
100 “fossil record” from which genotypic and phenotypic changes can be measured (39, 40).

101         Evolution proceeded most rapidly early in the LTEE. By 2,000 generations, the  
102 populations were, on average, ~35% more fit than their ancestor. An increase in the  
103 exponential growth rate and a reduction in the duration of the lag phase prior to growth  
104 were major contributors to this improvement (41). By 50,000 generations, the average  
105 population was ~70% more fit than the ancestor (42, 43, 44). The trajectory for fitness  
106 relative to the ancestor is well described a power-law function, which implies that fitness  
107 may continue to increase indefinitely, albeit at progressively slower rates of  
108 improvement (42).

109           In the first 10,000 generations, cell size was found to have increased in all 12  
110 LTEE populations and their trajectories were positively correlated with fitness (40). The  
111 increase in cell volume was accompanied by a concomitant decrease in numerical yield,  
112 although the product of cell volume and number—the total biovolume yield—increased  
113 (41). In the meantime, several populations were found to have diverged in shape,  
114 producing more spherical cells (45, 46) and fitness has continued to increase for at least  
115 50,000 generations more (42, 43).

116           In this study, we sought to determine if cell size has continued to increase over  
117 time, and whether it still tracked with fitness. To that end, we measured cell size in the  
118 ancestor and the evolving populations at 2,000, 10,000 and 50,000 generations. We  
119 used both a Coulter particle counter and microscopy to measure cell volumes, and  
120 microscopy to characterize changes in cell shape. All 12 populations evolved larger  
121 cells. As previously seen in the fitness trajectories, the rate of change in cell volumes  
122 was fastest early in the experiment, and the trend was monotonically increasing over  
123 time. By 50,000 generations, the average cell volume in most populations was well over  
124 twice that of the ancestor, both during exponential growth and in stationary phase. The  
125 evolved cells tended to increase more in width than in length during the first 10,000  
126 generations, but they subsequently reverted to aspect ratios similar to the ancestral  
127 strain. However, there was considerable among-population variability in shape as well  
128 as size through the entire period. Analyses of genome sequence data also revealed  
129 mutations in cell-rod maintenance genes in almost every population. Lastly, we  
130 discovered greatly elevated cell mortality in the only population that evolved the novel

131 ability to use citrate in the growth medium as a carbon source. Overall, our data suggest  
132 that cell size and shape are important targets of selection in the LTEE.

133

## 134 **Results**

135

136 Our analyses and results are multi-faceted. They include: a comparison between two  
137 methods used to measure cell volumes; analyses of the evolutionary trends in cell size  
138 of both clones and whole-population samples; a comparison of sizes during exponential  
139 growth and at stationary phase; analyses of cell shape and the subsequent identification  
140 of mutations in genes known to affect cell shape; the correlation between cell size and  
141 relative fitness during the LTEE; and evidence for substantial cell mortality in a unique  
142 population.

143

### 144 *Cell volumes measured by two methods*

145 We first address whether the two approaches we used to estimate cell size provide  
146 comparable results. The Coulter-counter method directly estimates particle volumes,  
147 based on changes in conductance between two electrodes as cells suspended in an  
148 electrolyte solution are moved through a small aperture. The microscopy method  
149 involves obtaining cell images and processing them using software that defines the  
150 edges of objects, segments the objects into small pieces, and integrates the segments  
151 to estimate cell volumes. Fig. 1 shows the highly significant correlation in the median  
152 cell volumes estimated using the two approaches for the two ancestors and 36 evolved



153 clones from the 12 populations at three generations of the LTEE. All of these samples  
154 were grown in the same LTEE conditions and measured in stationary phase at the 24-h  
155 mark (i.e., when they would be transferred to fresh medium under the LTEE protocol).  
156 This concordance gives us confidence that we can use either approach when it is best  
157 suited to a given question. The Coulter counter method is especially well suited to  
158 efficient measurement of cell volumes for many cells from each of many samples. The  
159 microscopy and subsequent image processing, by contrast, is necessary to obtain  
160 information on changes in cell shape.

161

#### 162 *Temporal trends in cell size in evolved clones*

163 It was previously reported that cell size increased in parallel across all 12 LTEE  
164 populations through 10,000 generations, and that the increase in cell volume was  
165 strongly correlated with the populations' improved fitness in the LTEE environment (40).  
166 Subsequent papers reported continued fitness gains in the LTEE populations for an  
167 additional 40,000 generations (42, 43), albeit at a declining rate of improvement. Here  
168 we ask whether cell size also continued to increase, focusing first on the clones isolated  
169 from each population at 2,000, 10,000 and 50,000 generations and measured during  
170 stationary phase.

171 Fig. 2A shows that the evolved clones were all larger than their ancestors,  
172 although cell size did not always increase monotonically over the course of the LTEE.  
173 The median cell volumes of clones sampled from three populations (Ara-2, Ara-3, and  
174 Ara-6) were smaller at 10,000 generations than at 2,000 generations. Nonetheless, the

175 median cell volumes of all 12 populations at 50,000 generations were greater than at  
176 10,000 generations. However, the measurement noise associated with the rather small  
177 number of biological replicates (i.e., independent cultures) for each clone, and the  
178 requirement to correct for multiple hypothesis tests, make it difficult to statistically  
179 ascertain the changes in cell volume between clones from successive generations. One  
180 possibility is that individual clones are not always representative of the populations from  
181 which they were sampled. If that were the case, then we would expect to see more  
182 consistent temporal trends in whole-population samples than in clones. We will address  
183 that issue in the next section. On balance, the median cell volumes of the evolved  
184 clones were on average 1.49, 1.68, and 2.55 times greater than the ancestor at 2,000,  
185 10,000, and 50,000 generations, respectively (one-tailed paired *t*-tests:  $p = 0.0067$ ,  
186 0.0019, and 0.0006, respectively).

187        Besides the possible reversals in median cell size between 2,000 and 10,000  
188 generations in a few populations, two other unusual cases are noteworthy. The 50,000-  
189 generation clone from population Ara-3 had by far the largest cells, with a median cell  
190 volume that was ~1.6 times greater than any other population at the same time point  
191 (Fig. 2A). That population is the only LTEE population that evolved the capacity to use  
192 the abundant citrate in the DM25 medium as an additional carbon source beyond the  
193 glucose that limits the other populations (47, 48). The Cit<sup>+</sup> phenotype is clearly  
194 advantageous, although it should also be noted that growth is slower on citrate than on  
195 glucose (49). Given that slower-growing *E. coli* cells tend to be smaller than faster-  
196 growing cells (14,15, 16, 50), and that this population's growth shifts in an apparent

197 diauxic manner from glucose to citrate (49), it is surprising that this clone produces the  
198 largest stationary-phase cells of any clone we examined. Perhaps these cells are  
199 sequestering unused carbon, accounting for their large size; or perhaps the evident  
200 stress they face during growth on citrate (49) leads to some decoupling of their growth  
201 and division. The other noteworthy population is Ara+1, which showed the smallest  
202 increase in cell volume (Fig. 2A). This population also achieved the smallest fitness  
203 gains of any of the LTEE populations (42, 43). Given that growth rate is the main  
204 determinant of fitness in the LTEE (41), it is therefore interesting (but not surprising) that  
205 Ara+1 is both the least fit and produces the smallest cells of any of the LTEE  
206 populations.

207 Fig. 3A compares average cell volumes of the clones between the consecutive  
208 generations sampled. These analyses show that average cell size across the 12 LTEE  
209 lines increased significantly from the ancestor to generation 2,000, and between 10,000  
210 and 50,000 generations; however, the increase between 2,000 and 10,000 generations  
211 was not significant.

212

### 213 *Monotonic cell size trends among whole populations*

214 We have so far established that the cell volume of clones usually, but not always,  
215 increased between the generations tested. However, the evolutionary changes in clones  
216 are not always representative of the populations from which they are sampled. For this  
217 reason, we measured the cell volumes of whole-population samples at the same three  
218 generations to see whether they might show more consistent temporal trends. Fig. 2B

219 shows the cell volume trajectories for these measurements. Indeed, the population  
220 samples showed more consistent trends toward larger cells than did the clones. The  
221 grand mean trend of the whole populations (Fig. 3B) closely mirrored the overall trend  
222 seen for clones (Fig. 3A). However, the correlation between cell volumes measured on  
223 clones and whole populations, while highly significant overall, also showed considerable  
224 scatter (Fig. S1), indicating that individual clones are not always representative of the  
225 populations from where they were sampled. One such difference was that the median  
226 volume in the 50,000-generation whole-population sample of Ara-3 was no longer an  
227 outlier when compared to the other populations (Fig. 2B), in contrast to the  
228 measurements on the individual clones (Fig. 2A). Another difference was the increase in  
229 median cell size from the ancestral state to generation 50,000 was much greater in the  
230 whole-population sample of Ara+1 than in the individual clone.

231 Overall, the temporal trend in cell volume does not appear to have reached any  
232 upper bound or asymptote, as each generation of whole-population samples that we  
233 tested had significantly larger cells than the preceding generation (Fig. 3B). However,  
234 the intervals between samples were also progressively longer. Therefore, we calculated  
235 the average rate of change in cell volume from the slopes calculated for each population  
236 between adjacent time points (Fig. 4). The average rate of cell volume increase was  
237  $\sim 0.17$  fL per thousand generations in the first 2,000 generations but dropped to  $\sim 0.02$   
238 and  $\sim 0.007$  fL per thousand generations in the following 8,000- and 40,000-generation  
239 intervals, respectively. In summary, these data show that cell size has continued to

240 increase throughout the long duration of the LTEE, albeit at a decelerating pace and  
241 notwithstanding a few atypical evolved clones.

242

### 243 *Differences in cell size between exponential and stationary phases*

244 In the sections above, we established the following points: (i) there is good agreement  
245 between cell volumes estimated using the Coulter particle counter and by microscopy;  
246 (ii) the evolved cells are generally much larger than their ancestors; (iii) there is a nearly  
247 monotonic trend over time toward larger cells, although at a declining rate and with a  
248 few clones as outliers; and (iv) the independently evolving populations show substantial  
249 variation in their average cell sizes after 50,000 generations. All of these conclusions  
250 were obtained using cells in stationary phase, and it is of interest to ask whether they  
251 also hold for exponentially growing cells. However, examining these issues with  
252 exponentially growing cells presents additional challenges. In particular, owing to  
253 evolved changes in growth rates and lag times (41), cells from different generations and  
254 populations reach mid-exponential-phase growth at different times, complicating efforts  
255 to obtain consistent measurements. In addition, the DM25 medium in which the cells  
256 evolved is dilute: the stationary-phase population density of the ancestor is only  $\sim 5 \times$   
257  $10^7$  cells per mL, and it is even lower for most evolved clones owing to their larger cells.  
258 Hence, cells in mid-exponential-phase growth are usually at densities less than  $10^7$  cells  
259 per mL. For these reasons, and given the excellent correspondence between Coulter  
260 counter and microscopic data, we measured the distribution of cell volumes for  
261 exponentially growing cells using only the Coulter counter.

262 We measured cell volumes of the ancestors and 50,000-generation clones from  
263 all 12 LTEE populations 2 h and 24 h after they were transferred into fresh DM25  
264 medium (Fig. 5). At 2h, even the ancestors have begun growing exponentially (41), and  
265 none of the evolved strains grow so fast that they would have depleted the limiting  
266 glucose by that time (42). The 24-h time point corresponds to when the cells are  
267 transferred to fresh medium during the LTEE and hence leave stationary phase. This  
268 paired sampling strategy allows us to ask how predictive the stationary-phase cell  
269 volumes are of exponentially growing cells. In fact, we found a strong positive  
270 correlation in cell volumes measured during exponential growth and stationary phase  
271 (Fig. 6). The exponentially growing cells were consistently much larger than those in  
272 stationary phase for the ancestors as well as all of the 50,000-generation clones (Fig.  
273 5). For the evolved clones, the volumetric difference as a function of growth phase was  
274 ~2-fold, on average (Fig. S2). It is well known that bacterial cells are larger during  
275 exponential growth, with each fast-growing cell typically having multiple copies of the  
276 chromosome and many ribosomes to support maximal protein synthesis. In the dilute  
277 glucose-limited DM25 minimal medium, cells hit stationary phase abruptly, with the last  
278 population doubling using up as much glucose as all the previous doublings combined.  
279 The ~2-fold volumetric difference between the exponentially growing cells and those  
280 measured many hours later in stationary phase implies that they typically undergo a  
281 reductive division, either as they enter or during stationary phase. At the same time, the  
282 range in size between the 12 independently evolved clones was also roughly 2-fold

283 during both growth phases (Fig. 5), which indicates that the striking morphological  
284 divergence extends across growth phases.

285

### 286 *Changes in cell shape*

287 Cell size has clearly increased during the LTEE. Has cell shape also changed? Cell  
288 shape has sometimes been regarded as invariant for a given species. For example, *E.*  
289 *coli* has rod-shaped cells that typically maintain an aspect ratio (length-to-width) of ~4:1,  
290 independent of cell volume (51, 31). We examined and analyzed micrographs to see  
291 whether the larger cells that evolved in the LTEE maintained their ancestral aspect ratio.  
292 Alternatively, larger volumes might have evolved by disproportionate increases in either  
293 the length or width of cells. Yet another possibility is that the lineages diverged in their  
294 aspect ratios not only from their common ancestor, but also from one another. Fig. 7  
295 shows representative micrographs of the ancestors and the 50,000-generation clones. It  
296 is readily apparent that the different lineages have evolved different aspect ratios. To  
297 investigate these differences more systematically, we processed multiple micrographs  
298 of the ancestors and clones from generations 2,000, 10,000, and 50,000 using the  
299 *SuperSegger* package (52). Across all of the samples in total, we obtained lengths and  
300 widths (cross-sectional diameters) from >87,000 cells (see Methods). As a reminder, an  
301 increase in the aspect ratio relative to the ancestor implies a higher SA/V ratio for a  
302 given volume, whereas a decline in the aspect ratio indicates the opposite. Of course,  
303 having a larger cell alone also reduces the SA/V ratio, even without a change in the  
304 aspect ratio. One would typically expect a greater SA/V ratio to be beneficial for

305 resource acquisition, and therefore we might expect the evolved clones to have higher  
306 aspect ratios than the ancestral strains, especially given their increased volumes.

307 In fact, however, the opposite trend held, at least for the first 10,000 generations,  
308 as shown in Fig. 8. Clones from 10 of the 12 populations, at both 2,000 and 10,000  
309 generations, tended to produce relatively wider than longer cells in comparison to the  
310 ancestor ( $p = 0.0386$  based on a two-tailed sign test at each time point). By 50,000  
311 generations, the clones were split evenly: 5 had aspect ratios greater than the ancestor,  
312 5 had aspect ratios lower than the ancestor, and 2 had aspect ratios nearly identical to  
313 the ancestor. Note that the 50,000-generation clone from population Ara-3 is an  
314 extreme outlier, with cells that are exceptionally long and very large. This population is  
315 the one that evolved the novel ability to grow on citrate (47, 48, 49), and its unusual  
316 morphology is presumably related to its distinct metabolism.

317 Fig. 9A shows the average length-to-width ratios and their associated 95%  
318 confidence intervals, excluding the Cit<sup>+</sup> outlier at 50,000 generations. The ancestral  
319 cells had an average length-to-width ratio of 3.37. Recall that *E. coli* has been reported  
320 to typically maintain an average aspect ratio of about 4:1 (33, 51, 53). The aspect ratio  
321 we see is somewhat smaller. This difference might reflect variation between strains (the  
322 LTEE ancestor is a derivative of *E. coli* B, not K12) or some other factor. In any case,  
323 the mean aspect ratio across the evolved lines declined to 2.90 and 2.87 at 2,000 and  
324 10,000 generations, respectively, and then increased to 3.39 at generation 50,000,  
325 almost identical to the ancestral ratio. The early decline in the aspect ratio is statistically  
326 significant, as is the subsequent reversal (Fig. 9A). This reversal would increase the



327 SA/V ratio somewhat. However, it might not be sufficient to offset the reduction in the  
328 SA/V ratio associated with the much larger cell volumes at 50,000 generations. On  
329 balance, the LTEE lines evolved larger cell volumes by first increasing  
330 disproportionately in width, and later increasing their length, possibly to the benefit of a  
331 somewhat more favorable SA/V ratio.

332

### 333 *Analysis of changes in the SA/V ratio*

334 The reversion of the evolved clones to their ancestral aspect ratio (Fig. 9A), coupled  
335 with their overall increase in cell volume (Fig. 3A), raises the question of how much their  
336 SA/V ratios have changed. If selection to increase the diffusion of nutrients into cells is  
337 strong in the LTEE, then increasing cell length would be beneficial. However, the larger  
338 cell volume would have the opposite effect. To examine the net result of these changes,  
339 we calculated the SA/V ratio of the evolved clones using the equations for  
340 spherocylindrical cells from Ojkic et al. (32), which we presented in Introduction. We  
341 used the length and width values measured for clones using *SuperSegger* to compute  
342 for each cell  $\gamma$ , which depends on the aspect ratio, and from that the cell's surface area.  
343 We then divided that value by the cell's estimated volume to obtain its SA/V ratio. Given  
344 the early trend toward wider cells (lower aspect ratios) and the larger cell volumes at  
345 later generations, we expected lower SA/V ratios for the evolved clones relative to the  
346 ancestors, despite the later reversion toward the ancestral aspect ratio. Indeed, all 36  
347 evolved clones had a SA/V ratio that was lower than the ancestors (Fig. 10).

348 Fig. 9B shows the average SA/V ratio and associated 95% confidence intervals  
349 over time. We included the 50,000-generation Ara-3 clone in this analysis because its  
350 SA/V ratio (Fig. 10), unlike its aspect ratio (Fig. 8), was not an extreme outlier; that is, its  
351 atypical aspect ratio was largely offset by its large average cell volume (Fig. 2A). The  
352 mean SA/V ratio declined monotonically and significantly from 0.461 in the ancestor to  
353 0.430, 0.412, and 0.392 at 2,000, 10,000, and 50,000 generations, respectively. Even  
354 the reversion to the ancestral cell aspect ratio between 10,000 and 50,000 generations  
355 (Fig. 9A) was insufficient to offset the increase in cell volume over that same interval  
356 (Fig. 3A).

357 We also performed an isometric analysis to assess the extent to which the  
358 reversion to the ancestral aspect ratio between 10,000 and 50,000 generations changed  
359 the SA/V ratio. To do so, we used the cell aspect ratios measured at 10,000 generations  
360 and compared the average SA/V ratio at 50,000 generations to the hypothetical average  
361 using the earlier aspect ratios. The average SA/V ratio at 50,000 generations was ~6%  
362 higher as a consequence of the change in cell aspect ratio (Fig. S3), and this difference  
363 was significant ( $p = 0.0144$ ). Even so, the mean SA/V ratio continued to decline (Fig.  
364 9B) because the change in average cell aspect ratio over this period (Fig. 9A) was  
365 insufficient to offset the increase in average cell volume (Fig. 3A).

366

### 367 *Nearly spherical cells in one LTEE population*

368 While examining micrographs, we observed that cells from the Ara+5 population at  
369 2,000 and 10,000 generations looked like stubby rods, many of which were almost

370 spherical (Fig. 11). By 50,000 generations, however, the cells were rod-shaped (Fig. 7),  
371 suggesting that one or more mutations in morphogenic genes might contribute to this  
372 phenotype.

373         The typical rod-shaped cell morphology in *E. coli* is maintained by several  
374 proteins including MreB, MreC, MreD, MrdA (PBP2), and MrdB (RodA) (46, 54). To this  
375 end, we examined published whole-genome sequence data (55) for the clones in our  
376 study to identify any mutations in these genes. By 50,000 generations, all but one of the  
377 12 lines (Ara-5) had nonsynonymous mutations in at least one of these five shape-  
378 maintaining genes (Fig. 12). There were also a few synonymous changes, which were  
379 seen only in populations that had evolved point-mutation hypermutability, as well as one  
380 indel. However, the majority of mutations that arose and reached high frequency in  
381 these genes were nonsynonymous changes.

382         The 2000-generation clone from the Ara+5 population that produced the stubby  
383 cells had a single nonsynonymous mutation in *mreB*. This mutation was also present in  
384 the clones sampled from this population at 10,000 and 50,000 generations. There were  
385 no other mutations in the other four rod-shape maintenance genes at any of the  
386 timepoints. *E. coli* cells have been shown to become spherical when MreB is depleted  
387 (54), which strongly suggests that the *mreB* mutation is responsible for the stubby  
388 morphology observed in the early generations of this population. The fact that the Ara+5  
389 cells were not stubby at 50,000 generations, despite the *mreB* mutation, suggests some  
390 compensatory change that did not involve the five morphogenic genes considered here.  
391 Four other populations also had nonsynonymous *mreB* mutations by generation 50,000

392 (Fig. 12). Of these four, the clone from population Ara+1 also produced rather stubby  
393 cells (Fig. 7), resulting in the lowest aspect ratio of any of the 50,000-generation clones  
394 (Fig. 8). Whether the diverse effects of the *mreB* mutations on cell shape reflect the  
395 different mutations, the genetic backgrounds on which they arose, or both remains to be  
396 determined.

397

### 398 *Cell volume and fitness have remained highly correlated in the LTEE*

399 Cell size and relative fitness were previously shown to be strongly correlated during the  
400 first 10,000 generations of the LTEE (40). The fitness of these populations has  
401 continued to increase throughout this experiment (42, 43). In light of the continued  
402 increase in cell volumes reported in this work, we expected that cell size and fitness  
403 would continue to be correlated. To test this, we used the relative fitness data previously  
404 collected for the 12 LTEE populations through 50,000 generations (42), and we asked  
405 how well those fitness values correlate with the cell volumes we measured for the  
406 ancestors and the whole-population samples from three later generations. Fig. 13  
407 shows that cell volume and relative fitness have remained significantly correlated,  
408 although with substantial scatter. Some of this scatter reflects increased measurement  
409 noise when estimating relative fitness in later generations. These estimates are  
410 obtained by competing the evolved populations against a marked ancestor; as the  
411 relative fitness of the evolved bacteria increases, it becomes more difficult to enumerate  
412 accurately the relative performance of the two competitors.

413

414 *Elevated cell mortality in the population that evolved to grow on citrate*

415 We observed what we call “ghost” cells in micrographs of the 50,000-generation Cit<sup>+</sup>  
416 clone from the Ara-3 population. These cells were quite distinct from the ancestral  
417 strain and evolved clones from all other populations (Fig. 7). In terms of contrast with  
418 their background, the ancestor and other evolved clones had uniformly dark and opaque  
419 cells, in contrast to the lighter agar pad on which they were placed for imaging. Many of  
420 the Cit<sup>+</sup> cells, by comparison, were translucent (Fig. 7). Most translucent cells appeared  
421 intact, although we also saw some fragmented cells. We presume that the translucent  
422 cells that appear intact are nonetheless either dead or dying.

423 We also grew the Cit<sup>+</sup> clone in DM0, which is the same medium as used in the  
424 LTEE and our other experiments, except DM0 contains only the citrate but no glucose.  
425 The proportion of ghost cells is even higher in this citrate-only medium (Fig. 14). Some  
426 translucent cells had small punctations, or dots, within the cytoplasm, often at the cell  
427 poles (Fig. 14). These dots are reminiscent of the polyhydroxyalkanoate storage  
428 granules that some bacterial species produce under conditions where their growth is  
429 unbalanced (56, 57) or when cells are otherwise stressed (58, 59). It is also possible  
430 that these dots comprise the nucleoid or some other remnant of a leaky cytoplasm.

431 It is noteworthy that we observed these anomalous ghost cells at any appreciable  
432 frequency only in the unique Cit<sup>+</sup> population (47, 48). This observation of ghost cells,  
433 and the implication that many cells in this population are dead or dying, is supported by  
434 other observations that indicate the Cit<sup>+</sup> cells struggle with maintaining balanced growth  
435 on citrate (49). To test whether the ghost cells are dead, dying, or at least

436 physiologically incapacitated, we labeled stationary-phase cultures using a two-color  
437 live/dead stain. Our methods, full results, and in-depth analyses of these labelling  
438 experiments are presented elsewhere (49). Here we present a subset of the data, with  
439 an analysis that specifically compares the ancestor (REL606) and 50,000-generation  
440 Cit<sup>+</sup> clone (REL11364). Fig. 15A shows representative micrographs of the ancestral and  
441 evolved Cit<sup>+</sup> cells grown to stationary phase in the standard DM25 medium that contains  
442 glucose as well as citrate. Fig. 15B shows the estimated proportions of live (green) and  
443 dead (red) cells, obtained by pooling data from 5 independent cultures (i.e., biological  
444 replicates) for each clone. There was much more cell death in the cultures of the Cit<sup>+</sup>  
445 clone when compared to the ancestor. On average, 43.6% of the Cit<sup>+</sup> cells were scored  
446 as dead, based on greater intensity of the corresponding dye. By contrast, only 13.2%  
447 of the ancestral cells were scored as dead, and they exhibited much weaker intensity of  
448 that dye (Fig. 15A). The difference in the proportion of dead cells between the ancestor  
449 and the Cit<sup>+</sup> clone is highly significant ( $t = 2.9304$ ,  $df = 8$ , one-tailed  $p = 0.0094$ ). This  
450 result thus supports our hypothesis that the ghost cells seen in our original micrographs  
451 of the Cit<sup>+</sup> clones were indeed dead or dying.

452

## 453 **Discussion**

454

455 During the first 10,000 generations of the LTEE, 12 populations of *E. coli* increased in  
456 fitness and cell size as they evolved in and adapted to their glucose-limited minimal  
457 medium (40). The increase in cell size was unexpected, given the fact that larger cells

458 have greater metabolic demands and have SA/V ratios that are less favorable for  
459 supporting those demands. In the >60,000 generations since that study, the populations  
460 have continued to adapt to the glucose media, and their fitness has continued to  
461 increase with trajectories that are well described by a simple power law (42, 43). In this  
462 study, we sought to determine if cell size has continued to increase, and whether cell  
463 size still correlates with fitness. We measured changes in cell volume and shape for  
464 clones and whole-population samples. We used two methods: a Coulter counter that  
465 directly measures cell volume, and microscopy that allowed us to analyze both cell  
466 volume and shape using machine learning. The average cell volumes measured using  
467 the two methods were well correlated (Fig. 1).

468         The average cell increased monotonically over time in the whole-population  
469 samples (Figs. 4–5). Clones from three populations (Ara–2, Ara–3, Ara–6) deviated  
470 from this monotonic trend, producing smaller cells at 10,000 than at 2,000 generations  
471 (Fig. 2A). These idiosyncratic cases implies within-population heterogeneity. They might  
472 also be due, in part, to the clones being studied in an environmental context different  
473 from that in which they evolved. As an indication of the relevance of both of these  
474 explanations, two ecologically and genetically distinct lineages have coexisted in the  
475 Ara–2 population since ~6,000 generations, with coexistence mediated by differential  
476 growth on glucose and acetate, a metabolic byproduct (60, 61). In any case, our data  
477 show that average cell size and mean fitness have remained significantly correlated in  
478 the LTEE through 50,000 generations (Fig. 13), despite variation within and between  
479 populations.

480           We obtained most of our data on average cell size with cells in stationary phase,  
481 at the end of the LTEE's standard 24-hour period prior to the transfer into fresh medium.  
482 We did so because analyzing exponentially growing cells presents additional  
483 challenges. In particular, the evolved cells reach exponential-phase growth faster than  
484 the ancestor, owing to changes in growth rates and lag times (41). Also, cell densities  
485 are lower during exponential growth, especially given the low glucose concentration in  
486 the LTEE medium. Nonetheless, we performed a set of experiments to compare the  
487 average volumes of exponentially growing and stationary-phase populations (Fig. 5).  
488 Exponentially growing cells were larger than stationary-phase cells, and this difference  
489 was observed using both the ancestor and evolved bacteria, Bacterial cells are larger  
490 during exponential growth to accommodate more ribosomes (18) and replicating  
491 chromosomes (13, 17). The approximately two-fold difference in average cell volume  
492 between exponential and stationary phases for the 50,000-generation clones (Fig. S2)  
493 implies that these bacteria undergo a reductive division as they enter or during  
494 stationary phase.

495           The 12 LTEE populations have evolved shorter lag phases and faster maximal  
496 growth rates during their adaptation to the LTEE environment. Therefore, when  
497 compared to the ancestor, evolved cells spend more time in the stationary-phase period  
498 between transfers. In silico models of the daily transfer regime typical of experimental  
499 evolution systems, including the LTEE, have shown that virtual microbes can evolve to  
500 anticipate the transfer interval (62). A reductive division during stationary phase might  
501 prime the cells to grow faster when transferred into fresh medium by temporarily



502 increasing their SA/V ratio, potentially reducing the duration of the lag phase. However,  
503 we note that the LTEE ancestors also undergo a similar reductive division, as indicated  
504 by smaller cells in stationary phase than during exponential growth (Fig. 5). Thus, the  
505 reductive division per se does not account for the shortened lag phase in the evolved  
506 bacteria. In any case, future studies might examine when this reductive division occurs  
507 in the ancestral and evolved bacteria and, moreover, identify the metabolic cues and  
508 physiological processes involved.

509 We also observed substantial heterogeneity in the cell shape of the evolved lines  
510 (Fig. 7). One population (Ara+5) evolved stubby, almost spherical, cells early in the  
511 LTEE (Fig. 11A), evidently caused by a mutation in *mreB*, which encodes a protein  
512 involved in maintaining the rod shape that is typical of *E. coli*. This population later re-  
513 evolved more rod-shaped cells (Fig. 11B), although the genetic basis for that change is  
514 unclear. More generally, most populations evolved relatively wider cells during the first  
515 10,000 generations (Fig. 8), even though longer cells would have had a higher SA/V  
516 ratio (33). This trend suggests that cell size evolution in the LTEE is not tightly  
517 constrained by the SA/V ratio. In later generations, the average cell aspect ratio  
518 (length/width) reverted to the ancestral ratio (Fig. 9A), but not enough to prevent a  
519 further decline in the average SA/V ratio (Fig. 9B), as the mean cell volume continued to  
520 increase (Fig. 3A).

521 For a given cell volume, wider cells have lower SA/V ratios than longer cells.  
522 From the standpoint of acquiring limited nutrients, wider cells would therefore seem  
523 maladaptive, yet that is how the LTEE populations tended to evolve for the first 10,000

524 generations (Fig. 8). Might wider cells have had some benefit that overcame their  
525 unfavorable SA/V ratios? As a bacterial cell grows in size, it simultaneously replicates  
526 multiple copies of its chromosome. These copies must then be fully segregated into the  
527 two daughter cells, which requires moving them away from the cell center before the  
528 division can be completed (13). Rod-shaped bacteria like *E. coli* typically divide at the  
529 middle of the cell; the midpoint is defined by the proteins MinCDE, which oscillate  
530 between the cell poles every 40-90 seconds while consuming ATP (63, 64, 65, 66, 67,  
531 68). The number of MinCDE complexes doubles in cells longer than  $\sim 4 \mu\text{m}$ , while their  
532 oscillatory period remains constant (63). It has also been shown that MinCDE proteins  
533 do not oscillate at all in shorter cells, which have a reduced aspect ratio; instead, they  
534 exhibit stochastic switching between the two poles (69). This stochastic switching  
535 reduces the rate at which these proteins use ATP (70). Thus, one could imagine that  
536 evolving wider cells, which also have a reduced aspect ratio, would increase the ATP  
537 available for other metabolic processes. Future studies might study the oscillatory  
538 behavior and ATP consumption of these proteins in the LTEE lines.

539 Another potential advantage of wider cells is to minimize the macromolecular  
540 crowding that occurs within the highly concentrated cellular cytoplasm (71). Gallet et al.  
541 (72) suggested that the increased cell width in the LTEE lines might reduce the adverse  
542 effects of macromolecular crowding, but they did not directly test this hypothesis.  
543 However, they also proposed that the bacterial cells became larger in order to become  
544 less densely packed, which would allow greater internal diffusion of resources and  
545 macromolecules. Gallet et al. (72) found evidence in support of this second hypothesis

546 in the one LTEE population they examined, where the cell density (dry mass-to-volume)  
547 declined over evolutionary time. If the rate of resource acquisition from the external  
548 environment does not limit growth, then increasing the rate of internal diffusion should  
549 increase the cell's metabolic rate and, at least potentially, lead to faster growth and  
550 higher fitness (1, 73, 74, 75, 76, 77, 78, 79). Therefore, it would be interesting to extend  
551 the analyses performed by Gallet et al. (72) to all of the LTEE populations to assess the  
552 generality of their findings.

553 We also made the serendipitous discovery that one population, called Ara-3,  
554 evolved greatly elevated cell mortality (Figs. 10 and 19). That population is the only one  
555 that evolved the ability to assimilate energy from citrate, which is in the LTEE medium  
556 as an iron chelator (47). We subsequently showed that this increased mortality has  
557 persisted in the population for almost 20,000 generations, and perhaps even longer  
558 (49). The persistence of this elevated death suggests some physiological constraint that  
559 is difficult to overcome, though this cost must be smaller than the benefit provided by  
560 the access to this additional resource. In any case, a 50,000-generation clone that we  
561 analyzed from this population was also an outlier in other morphological respects,  
562 producing cells that are exceptionally large (Fig. 2A) and long (Fig. 8). In addition to the  
563 many ghost-like cells that appear to be dead or dying (Fig. 7), some of these translucent  
564 cells have inclusions within the cytoplasm (Fig. 14). Future studies may investigate the  
565 genetic and physiological bases of these unusual morphological traits and their relation  
566 to growth on citrate and cell death.

567           In summary, we have observed substantial changes in cell morphology, including  
568 shape as well as size, over the course of 50,000 generations of the *E. coli* LTEE. Some  
569 of the changes are highly repeatable including especially the parallel trend toward larger  
570 cells observed in all 12 independently evolving populations. At the same time, the  
571 replicate populations have evolved highly variable phenotypes, even under identical  
572 conditions, leading to approximately two-fold variation in their average cell volumes (Fig.  
573 5) as well as large differences in their aspect ratios (Fig. 8). The consistent trend toward  
574 larger cells (Fig. 2B), the strong positive correlation of cell volume with fitness (Fig. 13),  
575 and the parallel substitutions in genes involved in maintaining cell shape (Fig. 12) all  
576 suggest that the evolution of cell morphology is not a mere spandrel, but instead reflects  
577 adaptation to the LTEE environment. The resulting among-population variation in size  
578 and shape, however, suggest that precise changes in cell morphology were not critical  
579 to performance, because most populations have improved in relative fitness to a similar  
580 degree (43), despite different cell morphologies. Thus, the changes in cell size and  
581 shape during the LTEE reflect both natural selection and the idiosyncratic nature of the  
582 chance events, including mutations, particular to every evolving lineage.

583 **Figures and Tables**

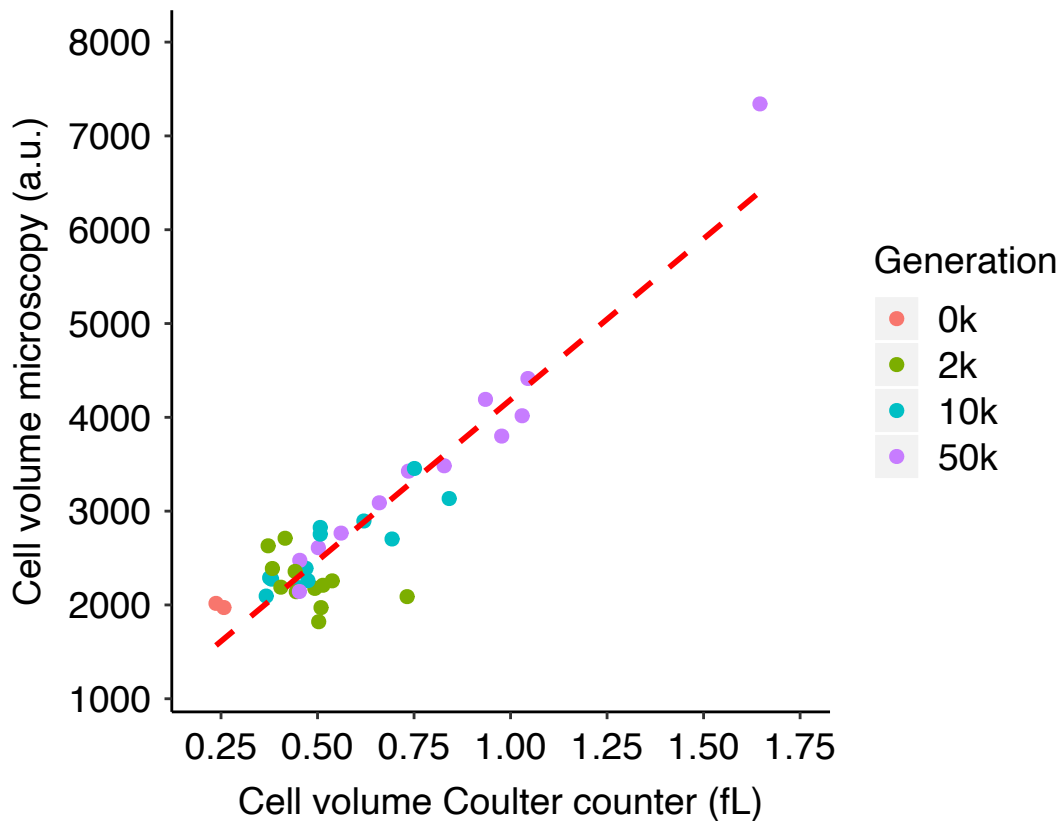

584  
585

586 **FIG 1.** Correlation between cell volume measurements obtained using microscopy and  
587 Coulter counter. Volumes obtained by microscopy are expressed in arbitrary units (a.u.)  
588 proportional to fL (i.e.,  $\mu\text{m}^3$ ); volumes obtained using the Coulter counter are expressed  
589 in fL. Each point shows the grand median of three assays for clones sampled from the 12  
590 evolving populations or of six assays for the two ancestral strains. Kendall's coefficient  $\tau$   
591 = 0.5495,  $N = 38$ ,  $p < 0.0001$ .

**A**

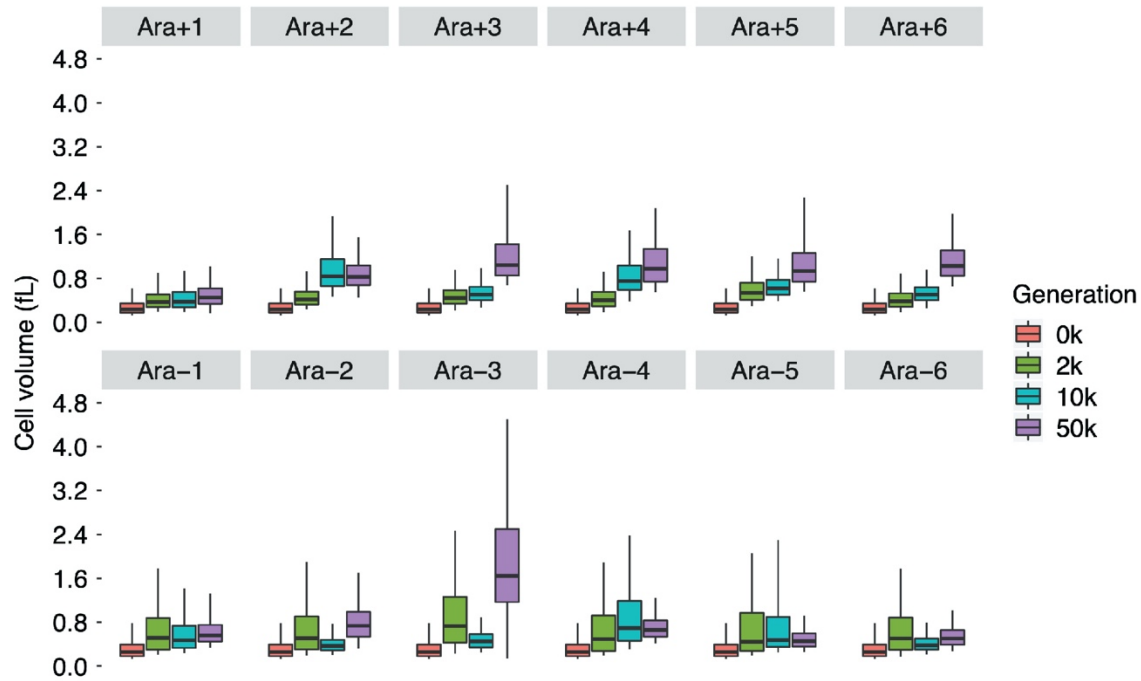

**B**

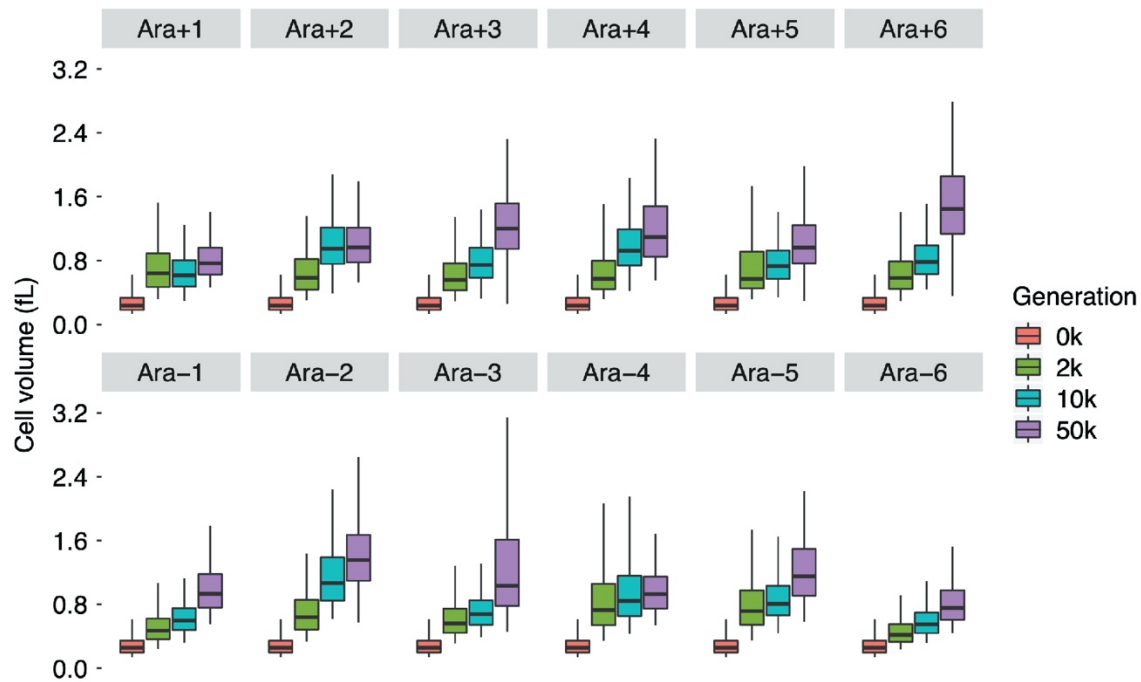

592  
593

594 **FIG 2.** Cell size trajectories for (A) clones and (B) whole-population samples obtained

595 using Coulter counter. Each quantile (5th, 25th, 50th, 75th, and 95th) represents the

596 median of the corresponding quantile from six replicates of each ancestor (REL607 for  
597 “Ara+” populations; REL606 for “Ara–” populations) and three replicates for cells sampled  
598 from each evolving population.

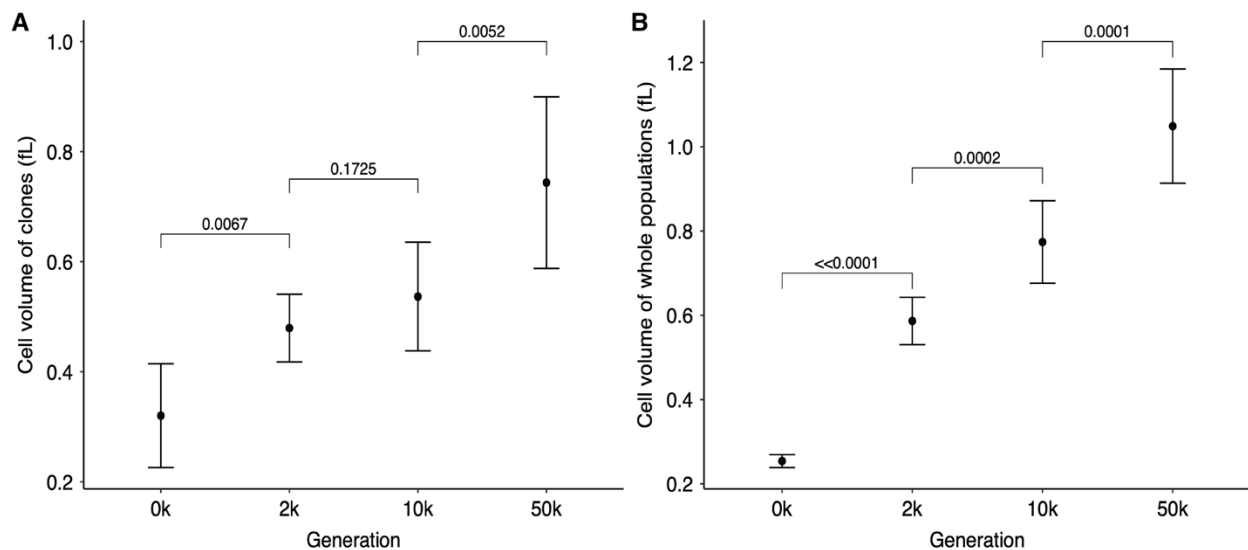

599  
600  
601  
602  
603  
604 **FIG 3.** Tests of changes over time in average cell sizes of (A) clones and (B) whole-  
605 population samples from the 12 LTEE populations. Each point shows the grand mean of  
606 the grand median cell volumes calculated for each population. The 50,000-generation  
607 clone from population Ara-3 was an extreme outlier (FIG 2A) and is excluded in panel A;  
608 however, the 50,000-generation whole-population sample from this population was not  
609 an outlier (FIG 2B). Error bars are 95% confidence intervals, and brackets show the  
610 statistical significance ( $p$  value) based on one-tailed paired  $t$ -tests. The last comparison  
611 in panel A remains significant even if one includes the outlier clone ( $p = 0.0090$ ).



612

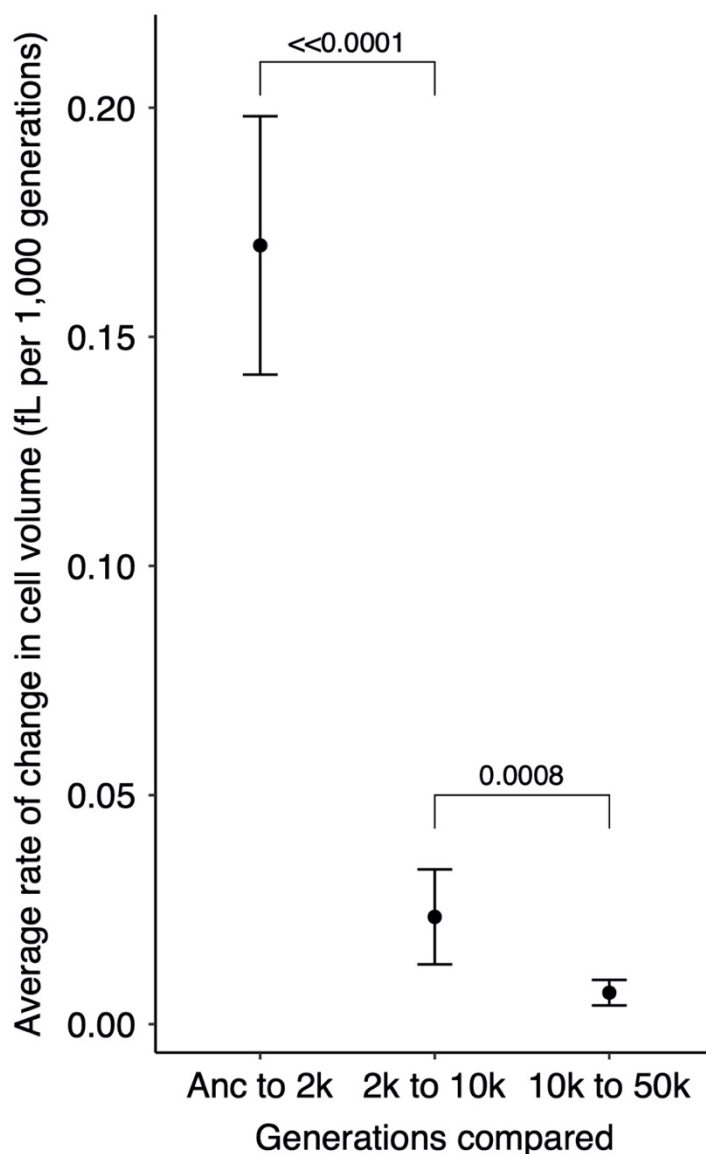

613

614

615

616 **FIG 4.** Average rate of cell volume increase. Slopes were calculated for each population

617 over each of three intervals. Each point shows the grand mean for the 12 populations.

618 Error bars are 95% confidence intervals, and brackets show the statistical significance (p

619 value) based on one-tailed Wilcoxon tests, which account for the paired nature of the

620 samples.

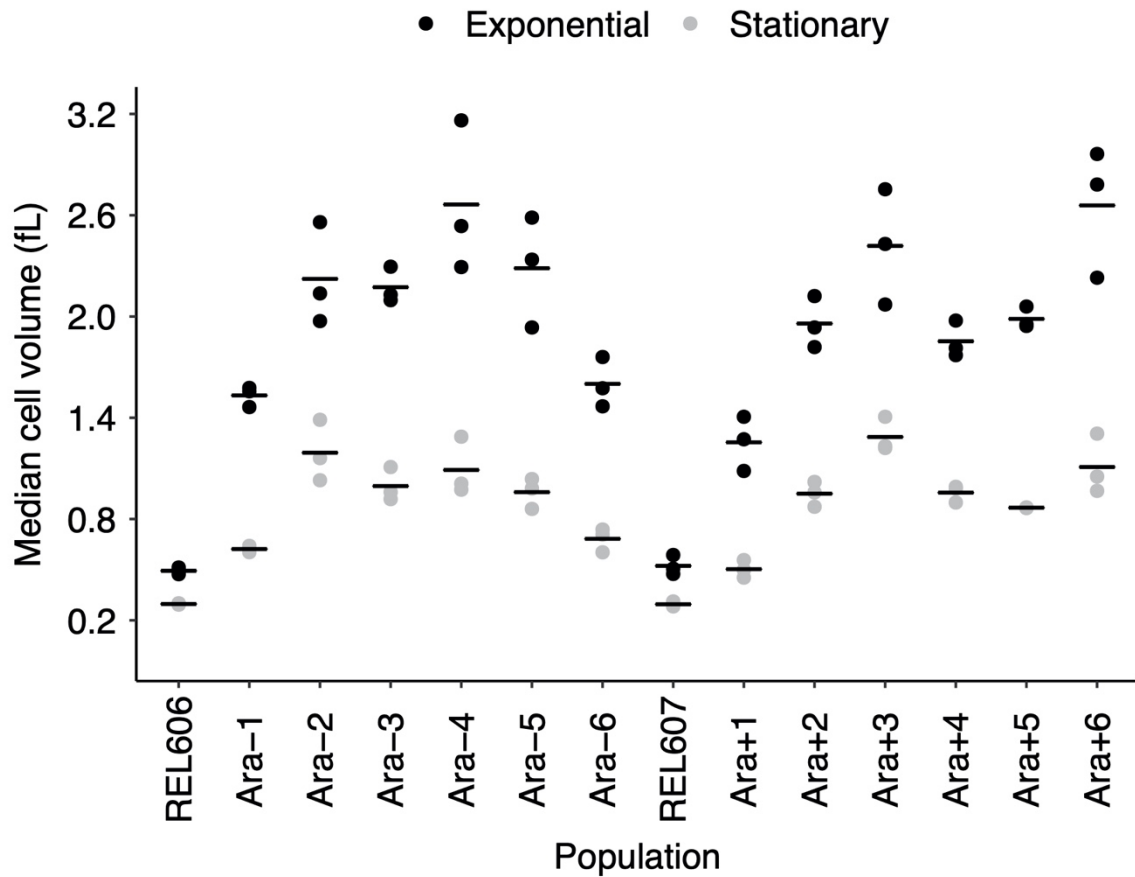

621  
622  
623  
624  
625  
626  
627  
628

**FIG 5.** Cell sizes measured during exponential and stationary phases of ancestral strains and 50,000-generation clones from all 12 populations. Each point represents the median cell volume for one assay at either 2 h (exponential growth) or 24 h (stationary phase) in DM25. Horizontal bars are the means of the 3 replicate assays for each strain. The points for some individual replicates are not visible because some values were almost identical.

629

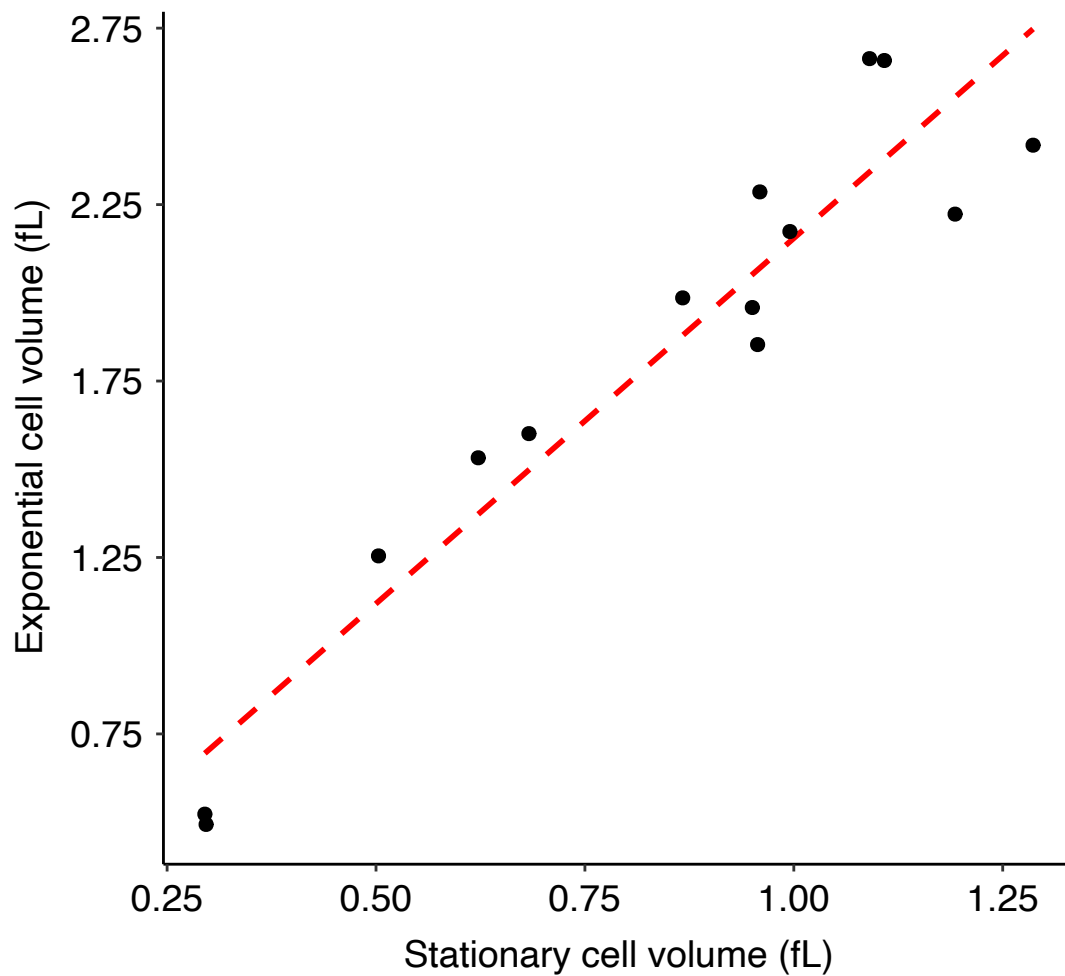

630

631

632

633 **FIG 6.** Correlation between cell sizes during exponential growth and in stationary phase.

634 Each point represents the average over 3 replicates of the median cell volume in each

635 growth phase using the data shown in FIG 5. Kendall's coefficient  $\tau = 0.7582$ ,  $N = 14$ ,  $p$

636  $\ll 0.0001$ .

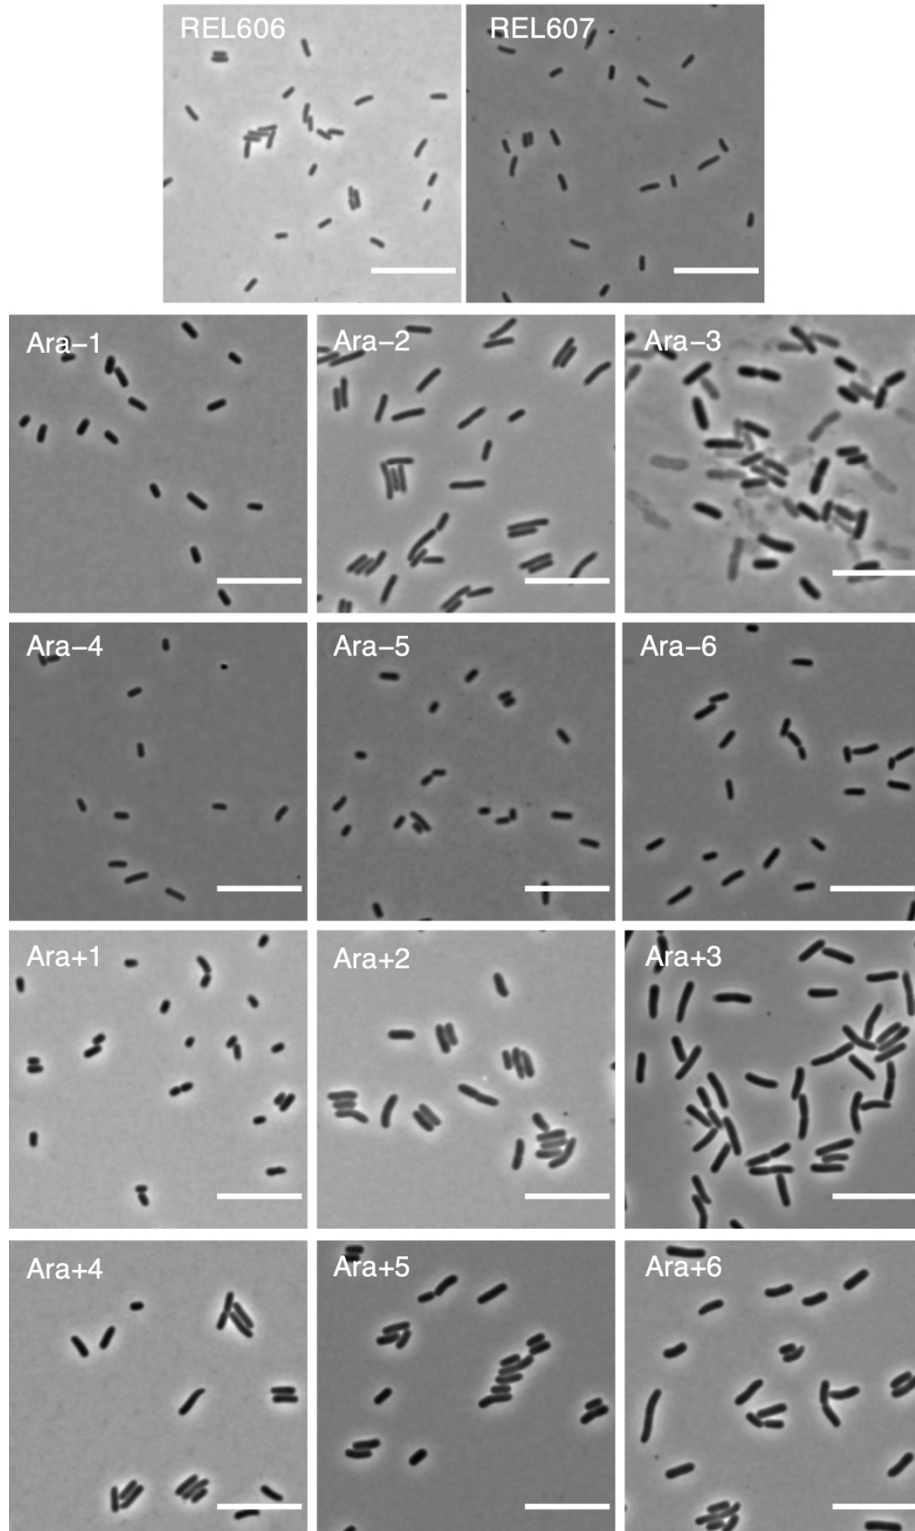

637  
638

639 **FIG 7.** Representative micrographs of ancestors (REL606 and REL607) and evolved  
640 clones from each population at 50,000 generations. Phase-contrast images were taken  
641 at 100 x magnification. Scale bars are 10  $\mu\text{m}$ .

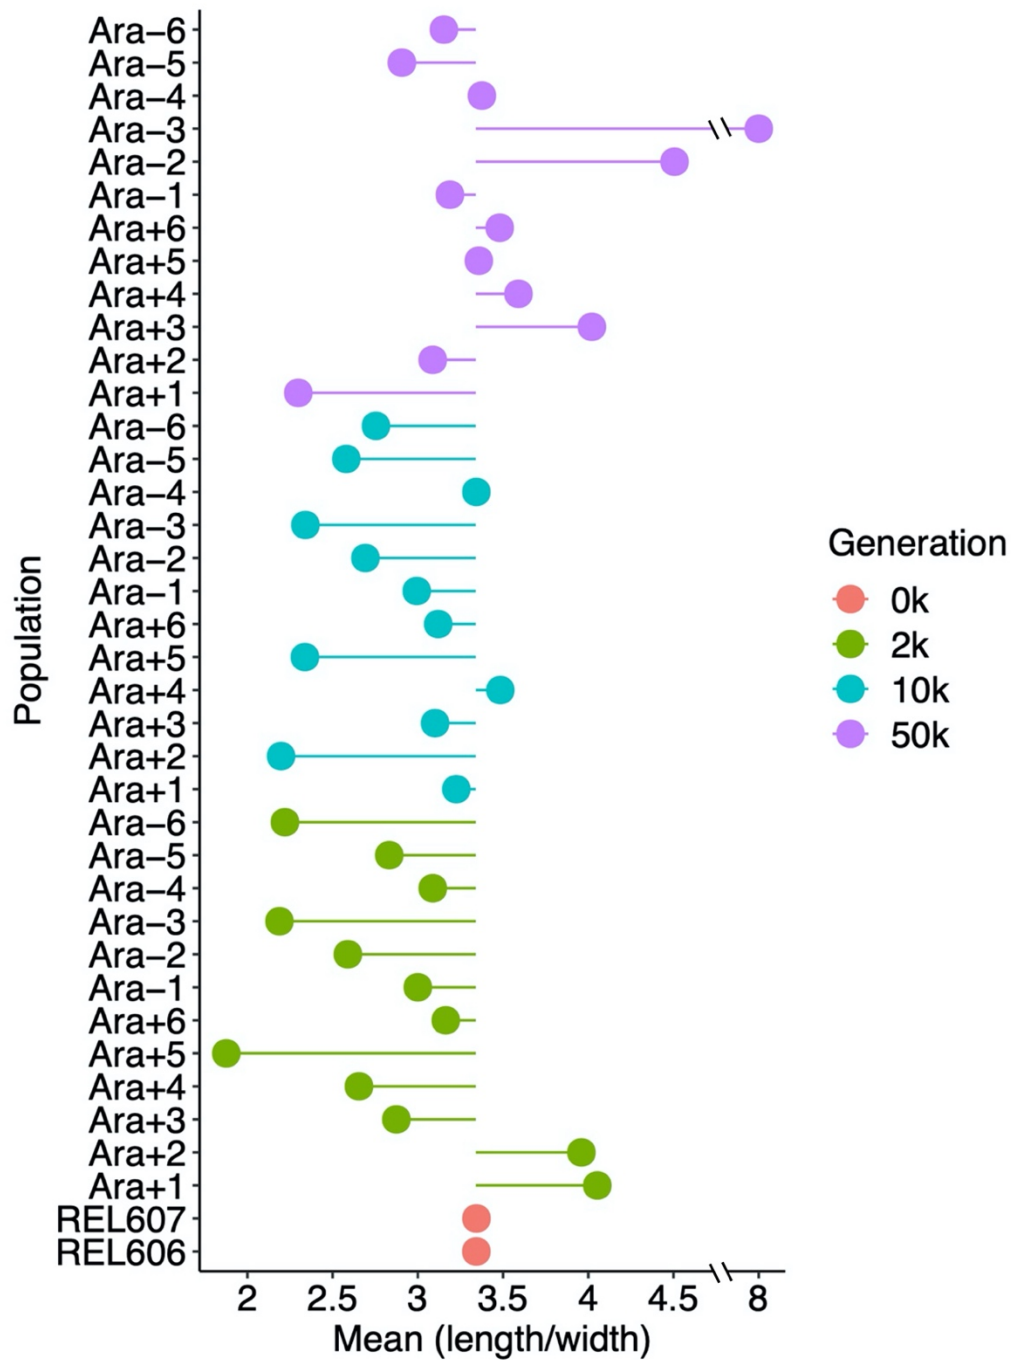

642

643

644 **FIG 8.** Average cell aspect ratios (length/width) of ancestral and evolved clones. Each

645 point shows the mean ratio for the indicated sample. The lines show deviations in the

646 aspect ratio from the ancestral state. The mean aspect ratios were calculated from three  
647 replicate assays in all but 4 cases (Ara-4 at 10,000 generations; Ara-2, Ara-4, and Ara-5  
648 at 50,000 generations), which had two replicates each.

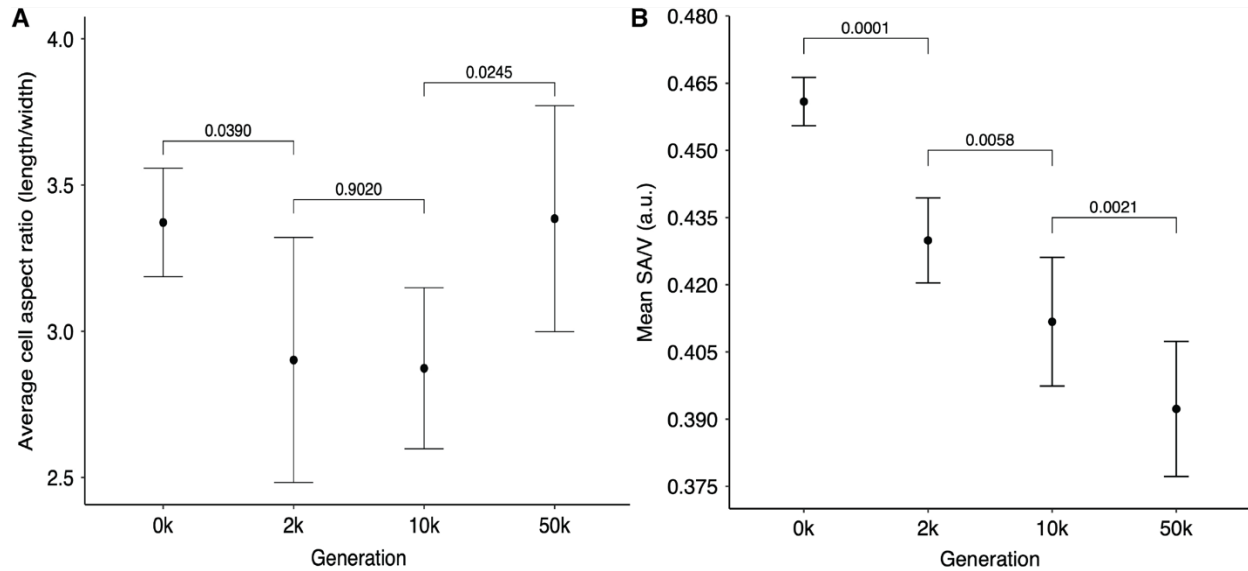

649

650

651 **FIG. 9.** Tests of changes over time in cell aspect and surface-to-volume (SA/V) ratios.

652 (A) Evolutionary reversal of cell aspect ratio. Each point is the grand mean of the cell

653 aspect ratio (length/width) for the ancestors and evolved clones.  $N = 12$ , except at 50,000

654 generations, where  $N = 11$  after excluding the outlier clone from the Ara-3 population.

655 Errors bars are 95% confidence intervals, and brackets show the statistical significance

656 (p value) based on two-tailed *t*-tests. The tests were paired for clones sampled from the

657 same population at the consecutive time points, and the Ara-3 population was excluded

658 from the final test. (B) Monotonic decline in SA/V ratio over 50,000 generations. Each

659 point shows the grand mean of the average ratio calculated for the ancestor and evolved



660 clones. Error bars are 95% confidence intervals, and brackets show the statistical  
661 significance ( $p$  value) based on one-tailed paired  $t$ -tests.

662

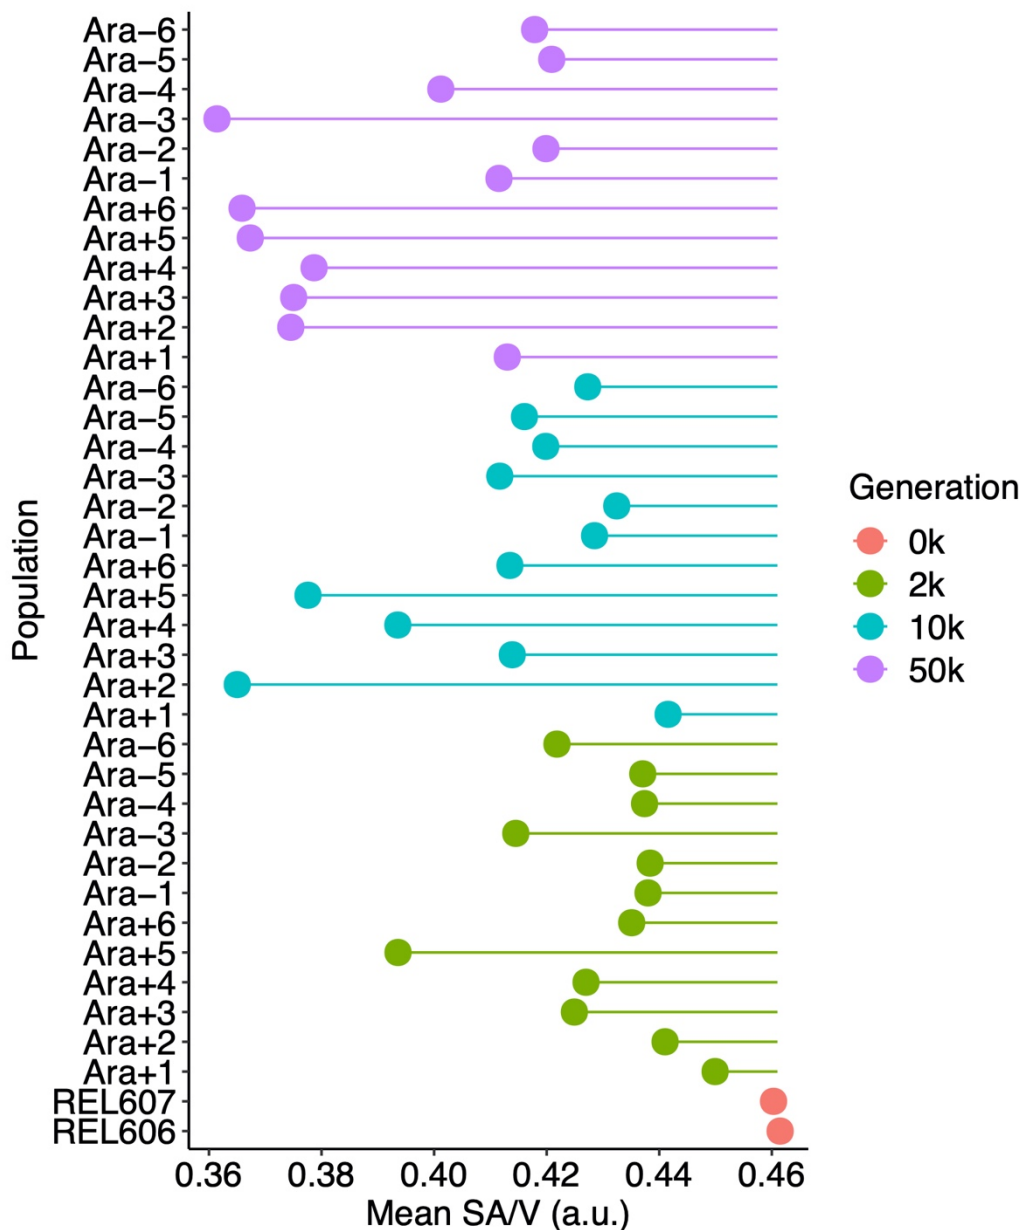

663

664

665 **FIG 10.** Average surface area-to-volume ratio (SA/V) of ancestral and evolved clones.

666 The surface area and volume of individual cells were calculated from microscopic images,

667 as described in the text, and their ratio has arbitrary units (a.u.) proportional to  $\mu\text{m}^{-1}$ . Each

668 point shows the mean ratio for the indicated sample. The lines show deviations in the  
669 ratio from the ancestral state. The means were calculated from three replicate assays in  
670 all but 4 cases (Ara-4 at 10,000 generations; Ara-2, Ara-4, and Ara-5 at 50,000  
671 generations), which had two replicates each.

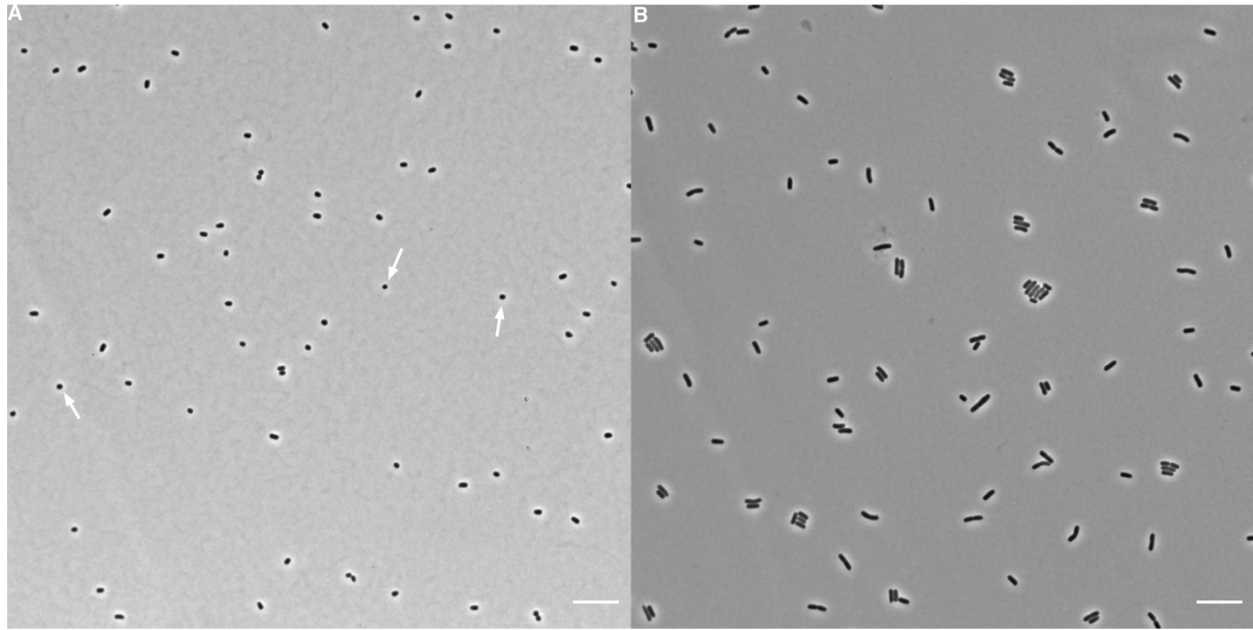

672

673

674 **FIG 11.** Representative micrographs of cells from (A) 2,000-generation and (B) 50,000-

675 generation clones of the Ara+5 population. Phase contrast images were taken on an

676 inverted microscope at 100 x magnification. Scale bars are 10  $\mu\text{m}$ . Arrows point to

677 examples of nearly spherical cells in the earlier sample, which are not seen in the later

678 one.

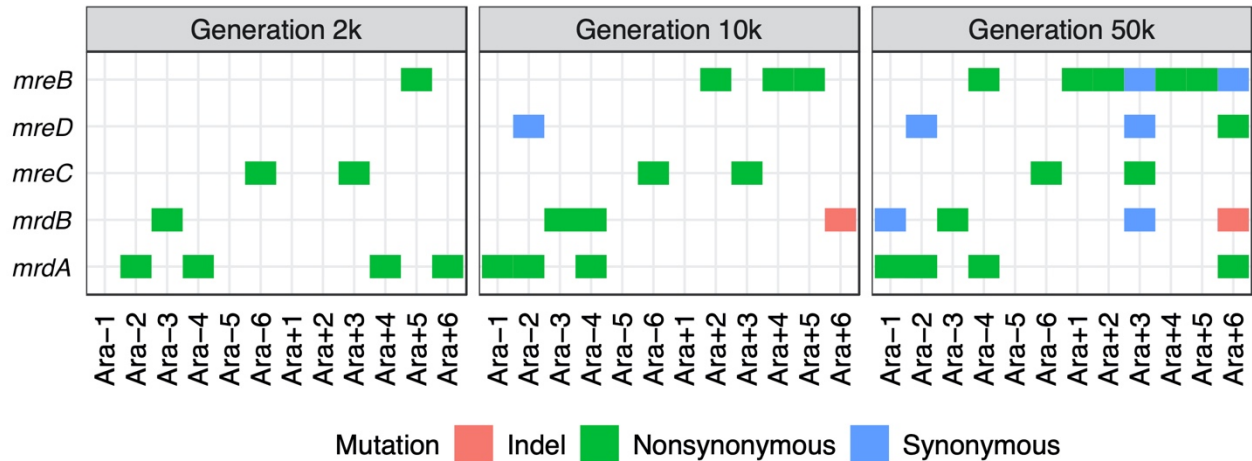

679  
680

681 **FIG 12.** Parallel mutations in genes known to be involved in the maintenance of rod-  
682 shaped genes. Nonsynonymous mutations were found in all populations except Ara-5 by  
683 50,000 generations. Populations Ara-2, Ara-4, Ara+3, and Ara+6 evolved hypermutable  
684 phenotypes between generations 2,000 and 10,000; populations Ara-1 and Ara-3 did so  
685 between 10,000 and 50,000 generations. Hence, all synonymous mutations were found  
686 in lineages with a history of elevated point-mutation rates.

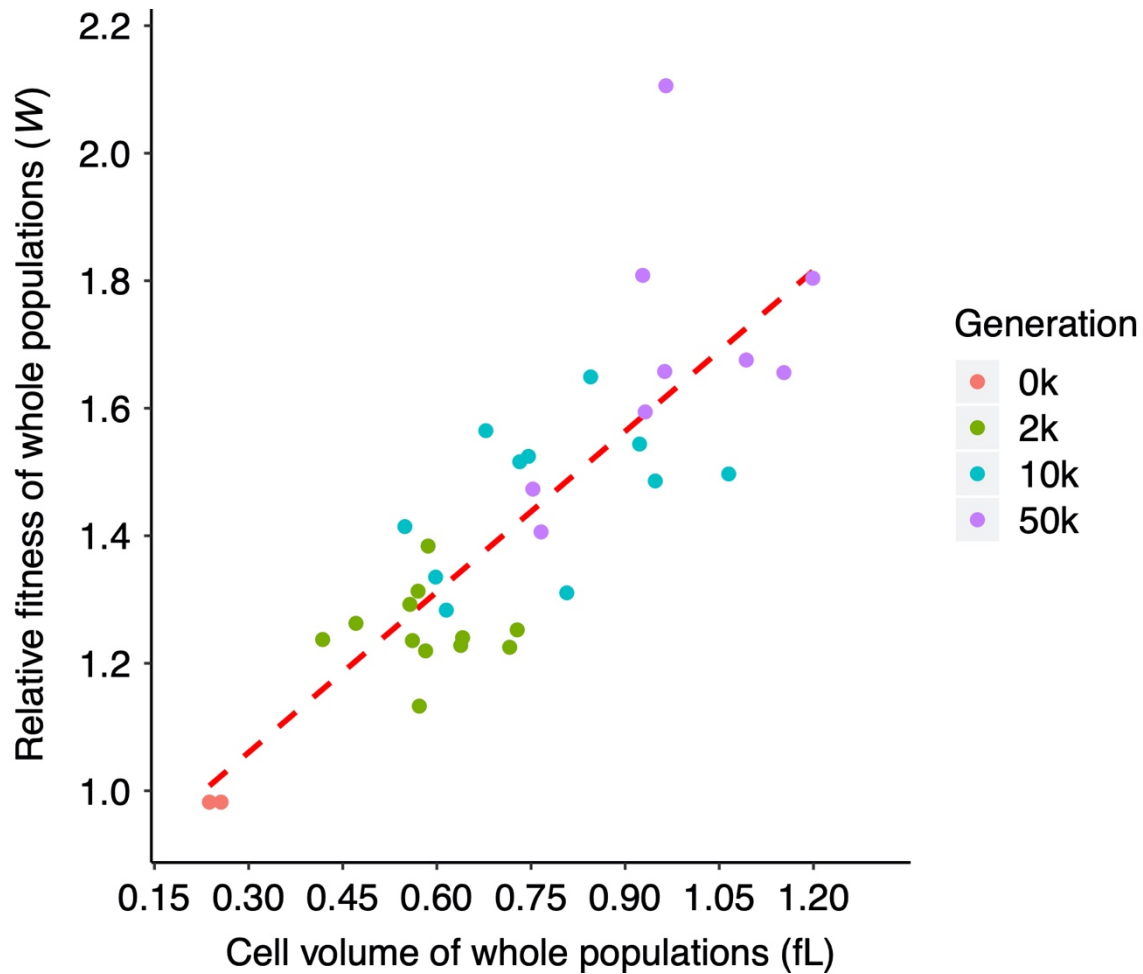

687  
688

689 **FIG 13.** Correlation between mean fitness relative to the LTEE ancestor and grand  
690 median cell volumes, both based on whole-population samples. Four points (Ara+6 at  
691 10,000 generations; Ara-2, Ara-3, and Ara+6 at 50,000 generations) are absent due to  
692 missing fitness values reported by Wisser et al. (2013). Kendall's  $\tau = 0.6066$ ,  $N = 34$ ,  $p <$   
693  $0.0001$ .

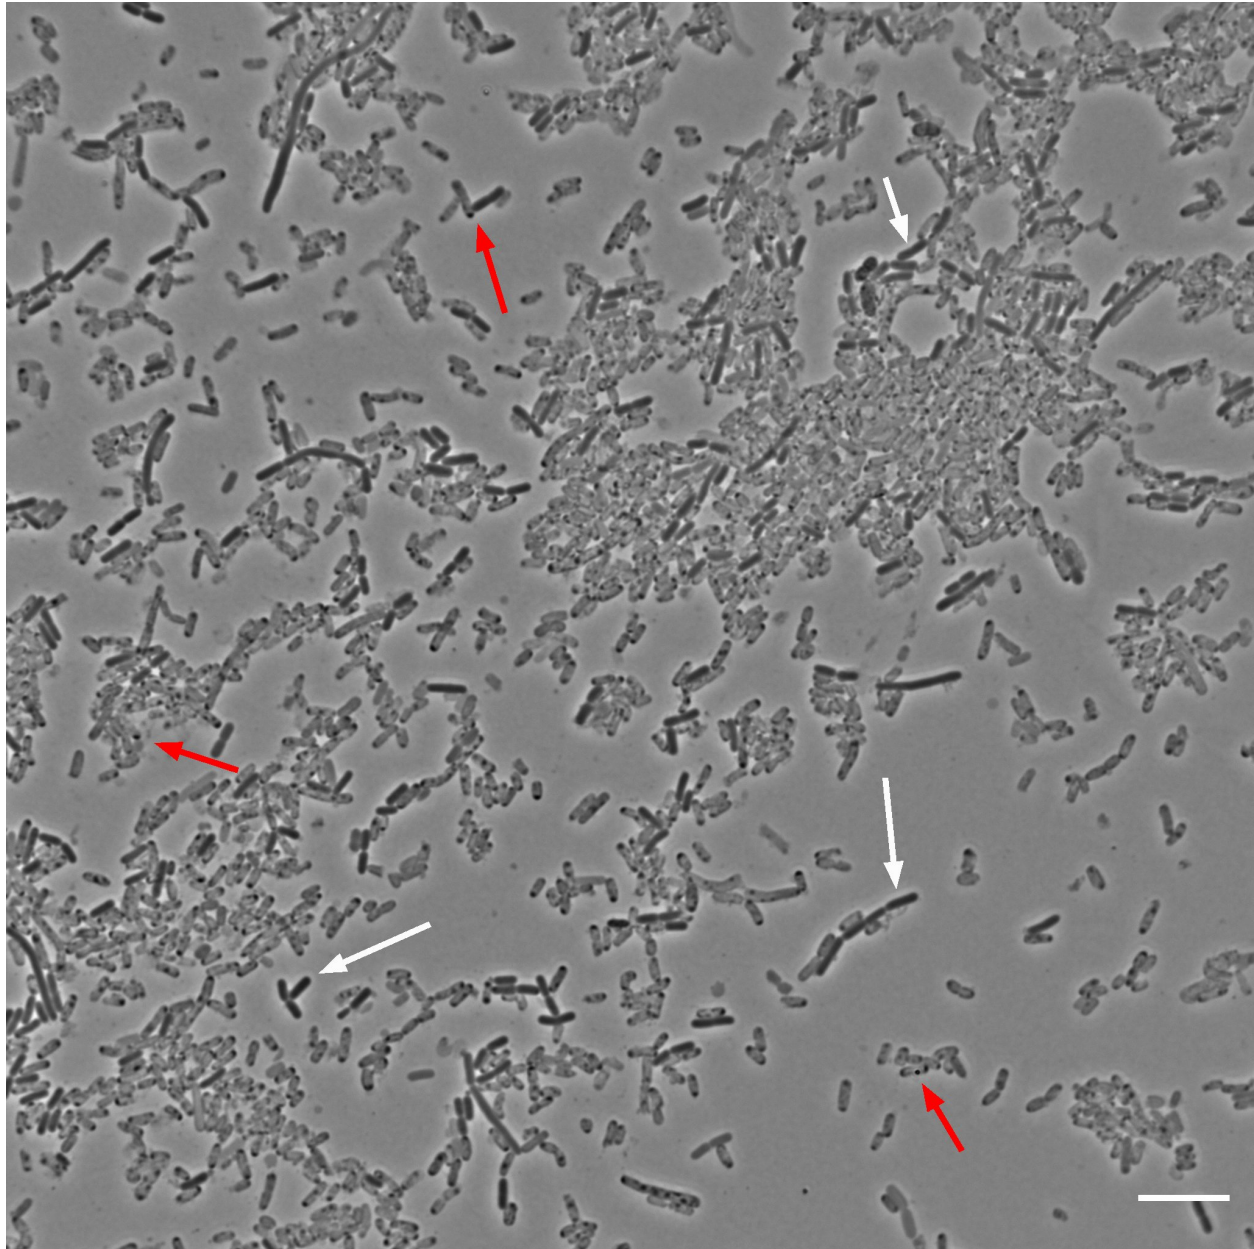

694

695

696 **FIG 14.** Representative micrograph of 50,000-generation Cit<sup>+</sup> clone from population

697 Ara-3 grown in DM0. As shown in FIG 7, we observed translucent “ghost” cells in the

698 only population that evolved the capacity to use citrate in the LTEE medium (DM25). This

699 clone can also grow on citrate alone in the same medium except without glucose (DM0),

700 which increased the proportion of presumably dead or dying ghost cells. Red arrows point  
701 to several ghost cells, some of which have darker punctate inclusions; white arrows point  
702 to several more typically opaque and presumably viable cells. Scale bar is 10  $\mu\text{m}$ .



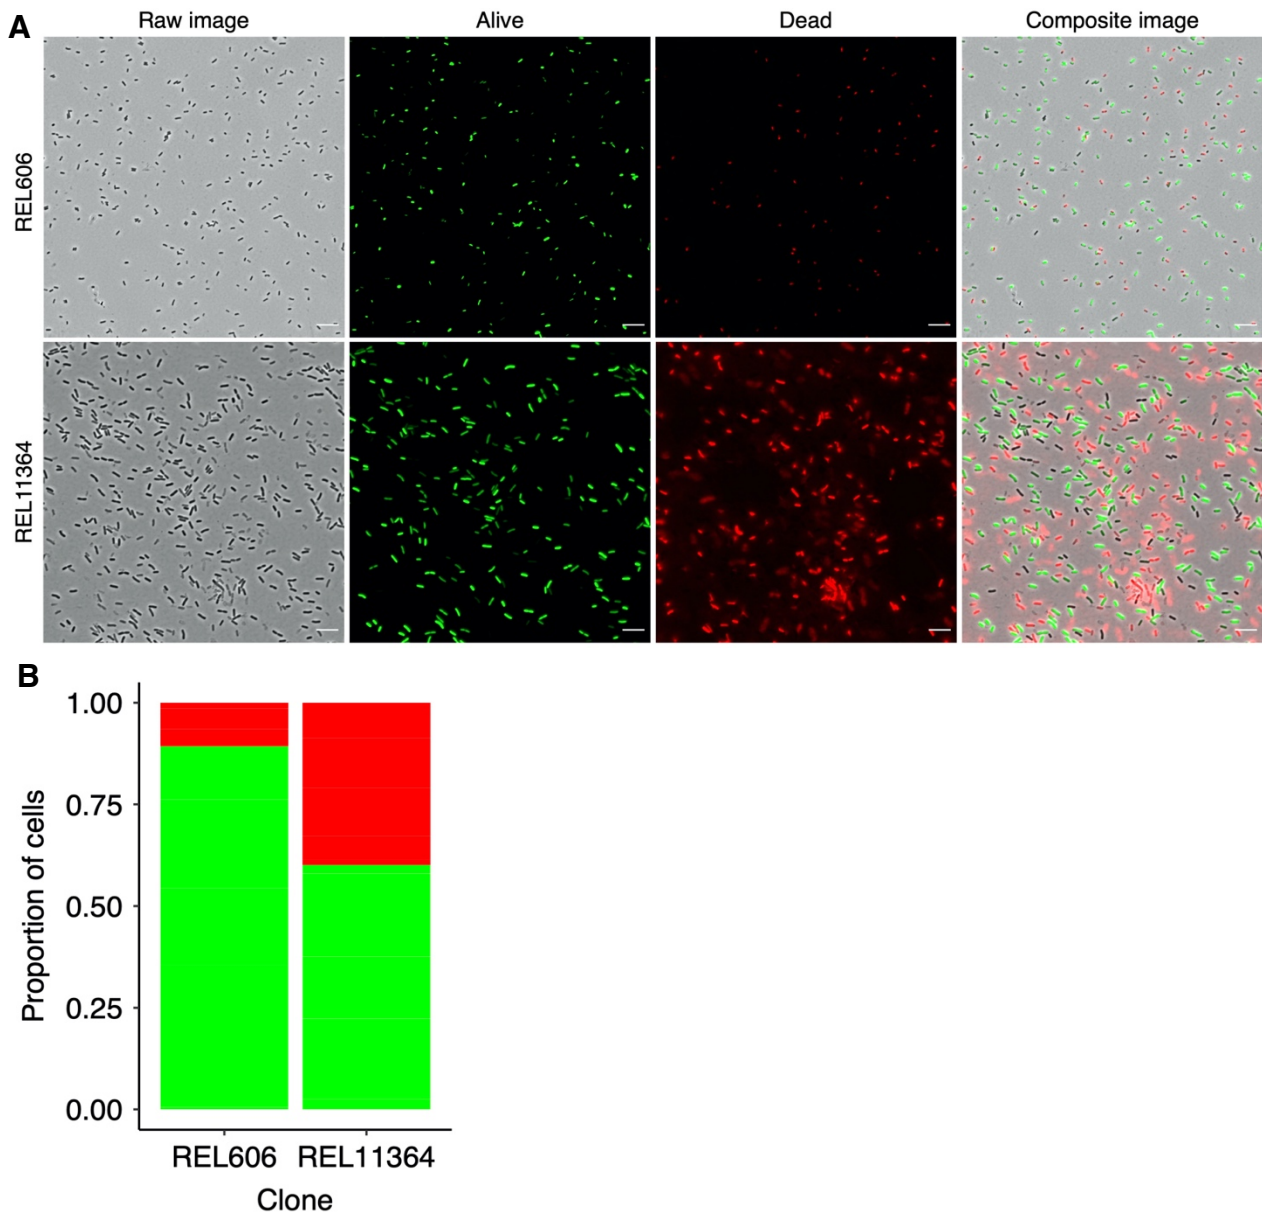

703

704

705 **FIG 15.** Comparison of cell death in the ancestor and Cit<sup>+</sup> clone. (A) Representative

706 micrographs showing live-dead staining of the LTEE ancestor (REL606) and the 50,000-

707 generation Cit<sup>+</sup> clone from population Ara-3 (REL11364), both grown in DM25. Scale

708 bars are 10  $\mu$ m. (B) Proportions of cells scored as alive (green) or dead (red), based on

709 two-color stain assay. For each clone, we assayed cells from 5 biological replicates, which  
710 have been pooled in this figure.

711 **Materials and Methods**

712

713 **Strains.** The *E. coli* LTEE is described in detail elsewhere (39, 42, 44). In short, 12  
714 populations were derived from a common ancestral strain, REL606. Six populations  
715 descend directly from REL606. The other six descend from REL607, which differs from  
716 REL606 by two selectively neutral mutations (55). Whole-population samples and  
717 clones from each population have been frozen at 500-generation intervals. These  
718 materials permit the retrospective analysis of genotypic and phenotypic evolution. In this  
719 study, we used both clones (Table S1) and whole-population samples (Table S2) from  
720 2,000, 10,000 and 50,000 generations.

721

722 **Culture conditions.** Samples from the freezer were slightly thawed, inoculated into LB  
723 broth, and grown overnight at 37°C. These cultures were diluted 1:10,000 in 9.9 mL  
724 Davis Mingioli medium containing 25 ug mL<sup>-1</sup> glucose (DM25). Cultures were incubated  
725 at 37°C in 50-mL Erlenmeyer flasks, with orbital shaking at 120 rpm for 24 h. These  
726 conditions are the same as those used in LTEE. The following day, we diluted cultures

727 1:100 in fresh DM25 and grew them for 2 h or 24 h for exponential and stationary phase  
728 cell measurements, respectively.

729

730 **Volumetric and shape measurements.** Cell sizes were measured using two analytical  
731 approaches. In one, we used the Coulter Multisizer 4e (Beckman), an electronic device  
732 that measures cell volume following the Coulter principle (80). In this study, we used a  
733 30- $\mu\text{m}$  aperture, and we measured particle sizes in the range from 2% to 60% of the  
734 aperture diameter, which corresponds to a volumetric range of 0.113 fL to 3,054 fL.  
735 However, we excluded any particles over 6 fL in our analyses. On several occasions we  
736 calibrated the aperture using 5.037- $\mu\text{m}$  diameter wide latex beads (Beckman). The  
737 measured variance in bead size was below the recommended threshold of 2.0% at  
738 each calibration.

739 In the second approach, we imaged cells using phase-contrast microscopy, and  
740 we processed the resulting micrographs using the *SuperSegger* package (52).  
741 *SuperSegger* automatically identifies the boundary between cells and segments the  
742 individual cells on a micrograph. It returns measurements aligned to the midline of each  
743 cell for the long and short axes, which we used as length and width, respectively. The

744 volume (in arbitrary units) of a cell is approximated by integrating over all segments  
745 within the cell's boundaries (82). Given the low density of cells in DM25 even at  
746 stationary phase, and to obtain sufficient numbers of cells for analysis in many visual  
747 fields, we concentrated most cultures 2-fold by centrifugation at 7,745 g for 2 min.  
748 Clones from two populations at generation 50,000 (Ara-1 and Ara-4) required 4-fold  
749 concentration. Samples from another population at generation 50,000 (Ara-3) were  
750 imaged without concentrating the medium. We then spotted 3- $\mu$ l samples from each  
751 processed culture onto 1% agarose pads, and we imaged the cells using a Nikon  
752 Eclipse Ti-U inverted microscope.

753

754 **Analysis of cell mortality in population Ara-3.** We reanalyzed data on cell viability  
755 collected for two clones: the LTEE ancestor (REL606), and the 50,000-generation clone  
756 from population Ara-3 (REL11364) that evolved the novel ability to use citrate as a  
757 source of carbon and energy (Cit<sup>+</sup>). We used the *BacLight* viability kit for microscopy  
758 (ThermoFisher #L7007) following the manufacturer's directions for fluorescently labeling  
759 cells. In short, we mixed the provided components A and B in equal amounts, added 1  
760  $\mu$ l to 10-mL stationary-phase DM25 cultures of each clone, and incubated them for 20

761 min in the dark to prevent photobleaching. The two components contain two fluorescent  
762 dyes that differentially stain presumptively live and dead cells. For the Cit<sup>+</sup> clone only,  
763 we also examined cells in DM0 medium, which contains the same concentration of  
764 citrate as DM25, but no glucose. Full methods and additional results in the context of  
765 other work are reported in Blount et al. (49).

766

767 **Genomic and fitness data.** We integrated our analyses of cell size and shape with  
768 previously published datasets on the fitness of the evolved bacteria relative to their  
769 ancestor, and on the mutations present in the various clones obtained by sequencing  
770 and comparing the evolved and ancestral genomes. The fitness data were previously  
771 collected by Wisser et al. (42), who performed competition assays between evolved  
772 populations and reciprocally marked ancestors. We downloaded these data from the  
773 Dryad Digital Repository (accession <https://doi.org/10.5061/dryad.0hc2m>). The  
774 complete genomes of the ancestral strain and evolved clones used in our study were  
775 sequenced by Jeong et al. (81) and Tenaillon et al. (55), respectively. We used an  
776 online tool (<http://barricklab.org/shiny/LTEE-Ecoli/>) to identify all of the mutations that

777 occurred in several genes (*mreB*, *mreC*, *mreD*, *mrdA*, and *mrdB*) known to be involved  
778 in maintaining rod-shaped cells in *E. coli*.

779

780 **Statistical analyses.** Statistical analyses were performed in R (Version 3.5.0, 2018-04-  
781 23). Our datasets and R analysis scripts will be made available on the Dryad Digital  
782 Repository (DOI pending publication).

783

784

## 785 **Acknowledgments**

786

787 We thank Terence Marsh, Charles Ofria, Gemma Reguera, and Chris Waters for  
788 feedback as this research progressed, and members of the Lenski lab for valuable  
789 discussions. We also thank Rohan Maddemsetti and Zachary Blount for their comments  
790 on the manuscript. This work was supported in part by a grant from the National  
791 Science Foundation (currently DEB-1951307), the BEACON Center for the Study of  
792 Evolution in Action (DBI-0939454), and the USDA National Institute of Food and  
793 Agriculture (MICL02253). Any opinions, findings, and conclusions or recommendations  
794 expressed in this material are those of the authors and do not necessarily reflect the  
795 views of the funders.

796

797 **References**

- 798 1. Marshall WF, Young KD, Swaffer M, Wood E, Nurse P, Kimura A, Frankel J,  
799 Wallingford J, Walbot V, Qu X, Roeder AHK. 2012. What determines cell size?  
800 BMC Biol 10:101.
- 801 2. Young KD. 2006. The selective value of bacterial shape. Microbiol Mol Biol Rev  
802 70:660–670.
- 803 3. Corno G, Jürgens K. 2006. Direct and indirect effects of protist predation on  
804 population size structure of a bacterial strain with high phenotypic plasticity. Appl  
805 Environ Microbiol 72:78–86.
- 806 4. Batani G, Pérez G, Martínez de la Escalera G, Piccini C, Fazi S. 2016.  
807 Competition and protist predation are important regulators of riverine bacterial  
808 community composition and size distribution. J Freshw Ecol 31:609–623.
- 809 5. Champion JA, Walker A, Mitragotri S. 2008. Role of particle size in phagocytosis  
810 of polymeric microspheres. Pharm Res 25:1815–1821.
- 811 6. Doshi N, Mitragotri S. 2010. Macrophages recognize size and shape of their  
812 targets. PLoS One 5:e10051.
- 813 7. St-Pierre F, Endy D. 2008. Determination of cell fate selection during phage  
814 lambda infection. Proc Natl Acad Sci U S A 105:20705–20710.
- 815 8. Choi C, Kuatsjah E, Wu E, Yuan S. 2010. The effect of cell size on the burst size  
816 of T4 bacteriophage infections of *Escherichia coli* B23. JEMI 14:85–91.
- 817 9. Koch AL. 2003. Bacterial wall as target for attack: past, present, and future  
818 research. Clin Microbiol Rev 16:673–687.



- 819 10. Miller C. 2004. SOS response induction by beta-lactams and bacterial defense  
820 against antibiotic lethality. *Science* 305:1629–1631.
- 821 11. Nikolaidis I, Favini-Stabile S, Dessen A. 2014. Resistance to antibiotics targeted  
822 to the bacterial cell wall. *Protein Sci* 23:243–259.
- 823 12. Cooper GM. 2000. *The Cell: A Molecular Approach*, 2nd edition. Sinauer,  
824 Sunderland, Mass.
- 825 13. Chien AC, Hill NS, Levin PA. 2012. Cell size control in bacteria. *Curr Biol*  
826 22:R340–R349.
- 827 14. Schaechter M, Maaloe O, Kjeldgaard NO. 1958. Dependency on medium and  
828 temperature of cell size and chemical composition during balanced growth of  
829 *Salmonella typhimurium*. *J Gen Microbiol* 19:592–606.
- 830 15. Bremer H, Dennis PP. 2008. Modulation of chemical composition and other  
831 parameters of the cell by growth rate. *Escherichia coli* and *Salmonella*  
832 *typhimurium*: Cellular and Molecular Biology 3:1–2.
- 833 16. Akerlund T, Nordstrom K, Bernander R. 1995. Analysis of cell size and DNA  
834 content in exponentially growing and stationary-phase batch cultures of  
835 *Escherichia coli*. *J Bacteriol* 177:6791–6797.
- 836 17. Wang JD, Levin PA. 2009. Metabolism, cell growth and the bacterial cell cycle.  
837 *Nat Rev Microbiol* 7:822–827.
- 838 18. Valgepea K, Adamberg K, Seiman A, Vilu R. 2013. *Escherichia coli* achieves  
839 faster growth by increasing catalytic and translation rates of proteins. *Mol Biosyst*  
840 9:2344–2358.

- 841 19. Amir A. 2017. Is cell size a spandrel? *ELife* 6:1–8.
- 842 20. Gould SJ, Lewontin RC. 1979. The spandrels of San Marco and the panglossian  
843 paradigm: a critique of the adaptationist programme. *Proc R Soc Lond B Biol Sci*  
844 205:581–598.
- 845 21. Heim NA, Payne JL, Finnegan S, Knope ML, Kowalewski M, Lyons SK, McShea  
846 DW, Novack-Gottshall PM, Smith FA, Wang SC. 2017. Hierarchical complexity  
847 and the size limits of life. *Proc R Soc Lond B Biol Sci* 284:20171039.
- 848 22. Rappé MS, Connon SA, Vergin KL, Giovannoni SJ. 2002. Cultivation of the  
849 ubiquitous SAR11 marine bacterioplankton clade. *Nature* 418:630–633.
- 850 23. Giovannoni SJ. 2017. SAR11 bacteria: the most abundant plankton in the  
851 oceans. *Ann Rev Mar Sci* 9:231–255.
- 852 24. Angert ER, Clements KD, Pace NR. 1993. The largest bacterium. *Nature*  
853 362:239–241.
- 854 25. Levin PA, Angert ER. 2015. Small but mighty: cell size and bacteria. *Cold Spring*  
855 *Harb Perspect Biol* 7:a019216.
- 856 26. Mika JT, van den Bogaart G, Veenhoff L, Krasnikov V, Poolman B. 2010.  
857 Molecular sieving properties of the cytoplasm of *Escherichia coli* and  
858 consequences of osmotic stress. *Mol Microbiol* 77:200–207.
- 859 27. Mika JT, Poolman B. 2011. Macromolecule diffusion and confinement in  
860 prokaryotic cells. *Curr Opin Biotechnol* 22:117–126 .
- 861 28. Schavemaker PE, Boersma AJ, Poolman B. 2018. How important is protein  
862 diffusion in prokaryotes? *Front Mol Biosci* 5:1–16.

- 863 29. Yang DC, Blair KM, Salama NR. 2016. Staying in shape: the impact of cell shape  
864 on bacterial survival in diverse environments. *Microbiol Mol Biol Rev* 80:187–203.
- 865 30. Sourjik V, Wingreen NS. 2012. Responding to chemical gradients: bacterial  
866 chemotaxis. *Curr Opin Cell Biol* 24:262–268.
- 867 31. Tucker JD, Siebert CA, Escalante M, Adams PG, Olsen JD, Otto C, Stokes DL,  
868 Hunter CN. 2010. Membrane invagination in *Rhodobacter sphaeroides* is initiated  
869 at curved regions of the cytoplasmic membrane, then forms both budded and  
870 fully detached spherical vesicles. *Mol Microbiol* 76:833–847.
- 871 32. Ojkic N, Serbanescu D, Banerjee S. 2019. Surface-to-volume scaling and aspect  
872 ratio preservation in rod-shaped bacteria. *ELife* 8:1–11.
- 873 33. Harris LK, Theriot JA. 2018. Surface area to volume ratio: a natural variable for  
874 bacterial morphogenesis. *Trends Microbiol* 26:815–832.
- 875 34. Kawecki TJ, Lenski RE, Ebert D, Hollis B, Olivieri I, Whitlock MC. 2012.  
876 Experimental evolution. *Trends Ecol Evol* 27:547–560.
- 877 35. Ratcliff WC, Denison RF, Borrello M, Travisano M. 2012. Experimental evolution  
878 of multicellularity. *Proc Natl Acad Sci U S A* 109:1595–1600.
- 879 36. Graves JL, Hertweck KL, Phillips MA, Han MV, Cabral LG, Barter TT, Greer LF,  
880 Burke MK, Mueller LD, Rose MR. 2017. Genomics of parallel experimental  
881 evolution in *Drosophila*. *Mol Biol Evol* 34:831–842.
- 882 37. Lenski RE, Ofria C, Pennock RT, Adami C. 2003. The evolutionary origin of  
883 complex features. *Nature* 423:139–144.

- 884 38. LaBar T, Adami C. 2017. Evolution of drift robustness in small populations. *Nat*  
885 *Commun* 8:1012.
- 886 39. Lenski RE, Rose MR, Simpson SC, Tadler SC. 1991. Long-term experimental  
887 evolution in *Escherichia coli*. I. Adaptation and divergence during 2,000  
888 generations. *Am Nat* 138:1315–1341.
- 889 40. Lenski RE, Travisano M. 1994. Dynamics of adaptation and diversification: a  
890 10,000-generation experiment with bacterial populations. *Proc Natl Acad Sci U S*  
891 *A* 91:6808–6814.
- 892 41. Vasi F, Travisano M, Lenski RE. 1994. Long-term experimental evolution in  
893 *Escherichia coli*. II. Changes in life-history traits during adaptation to a seasonal  
894 environment. *Am Nat* 144:432–456.
- 895 42. Wiser MJ, Ribeck N, Lenski RE. 2013. Long-term dynamics of adaptation in  
896 asexual populations. *Science* 342:1364–1367.
- 897 43. Lenski RE, Wiser MJ, Ribeck N, Blount ZD, Nahum JR, Morris JJ, Zaman L,  
898 Turner C, Wade B, Maddamsetti R, Burmeister AR, Baird EJ, Bundy J, Grant NA,  
899 Card KJ, Rowles M, Weatherspoon K, Papoulis SE, Sullivan R, Clark C, Mulka  
900 JS, Hajela N. 2015. Sustained fitness gains and variability in fitness trajectories  
901 in the long-term evolution experiment with *Escherichia coli*. *Proc R Soc Lond B*  
902 *Biol Sci* 282:20152292.
- 903 44. Lenski RE. 2017. Experimental evolution and the dynamics of adaptation and  
904 genome evolution in microbial populations. *ISME J* 11:2181–2194.

- 905 45. Lenski RE, Mongold JA. 2000. Cell size, shape, and fitness in evolving  
906 populations of bacteria. In: Brown J, West G (eds), *Scaling in Biology*. Oxford  
907 University Press, Oxford, pp 221–234.
- 908 46. Philippe N, Pelosi L, Lenski RE, Schneider D. 2009. Evolution of penicillin-  
909 binding protein 2 concentration and cell shape during a long-term experiment  
910 with *Escherichia coli*. *J Bacteriol* 191:909–921.
- 911 47. Blount ZD, Borland CZ, Lenski RE. 2008. Historical contingency and the  
912 evolution of a key innovation in an experimental population of *Escherichia coli*.  
913 *Proc Natl Acad Sci U S A* 105:7899–7906.
- 914 48. Blount ZD, Barrick JE, Davidson CJ, Lenski RE. 2012. Genomic analysis of a key  
915 innovation in an experimental *Escherichia coli* population. *Nature* 489:513–518.
- 916 49. Blount ZD, Maddamsetti R, Grant NA, Ahmed ST, Jagdish T, Baxter JA,  
917 Sommerfeld BA, Tillman A, Moore J, Slonczewski JL, Barrick JE, Lenski RE.  
918 2020. Genomic and phenotypic evolution of *Escherichia coli* in a novel citrate-  
919 only resource environment. *ELife* 9:e55414.
- 920 50. Mongold JA, Lenski RE. 1996. Experimental rejection of a nonadaptive  
921 explanation for increased cell size in *Escherichia coli*. *J Bacteriol* 178:5333–  
922 5334.
- 923 51. Chang F, Huang KC. 2014. How and why cells grow as rods. *BMC Biol* 12:54
- 924 52. Stylianidou S, Brennan C, Nissen SB, Kuwada NJ, Wiggins PA. 2016.  
925 SuperSegger : robust image segmentation, analysis and lineage tracking of  
926 bacterial cells. *Mol Microbiol* 102:690–700.

- 927 53. Si F, Li D, Cox SE, Sauls JT, Azizi O, Sou C, Schwartz AB, Ericstad MJ, Jun Y,  
928 Li X, Jun S. 2017. Invariance of initiation mass and predictability of cell size in  
929 *Escherichia coli*. *Curr Biol* 27:1278–1287.
- 930 54. Kruse T, Bork-Jensen J, Gerdes K. 2005. The morphogenetic MreBCD proteins  
931 of *Escherichia coli* form an essential membrane-bound complex. *Mol Microbiol*  
932 55:78–89.
- 933 55. Tenailon O, Barrick JE, Ribeck N, Deatherage DE, Blanchard JL, Dasgupta A,  
934 Wu GC, Wielgoss S, Cruveiller S, Médigue C, Schneider D, Lenski RE. 2016.  
935 Tempo and mode of genome evolution in a 50,000-generation experiment.  
936 *Nature* 536:165–170.
- 937 56. Pötter M, Steinbüchel A. 2006. Biogenesis and structure of polyhydroxyalkanoate  
938 granules. In: Shively JM (ed), *Inclusions in Prokaryotes*. Springer, Berlin, pp 110–  
939 136.
- 940 57. Jendrossek D. 2009. Polyhydroxyalkanoate granules are complex subcellular  
941 organelles (carbonosomes). *J Bacteriol* 191:3195–3202.
- 942 58. Al Rowaihi IS, Paillier A, Rasul S, Karan R, Grötzinger SW, Takanabe K,  
943 Eppinger J. 2018. Poly(3-hydroxybutyrate) production in an integrated  
944 electromicrobial setup: Investigation under stress-inducing conditions. *PLoS One*  
945 13:e0196079.
- 946 59. Obruca S, Sedlacek P, Slaninova E, Fritz I, Daffert C, Meixner K, Sedrlova Z,  
947 Koller M. 2020. Novel unexpected functions of PHA granules. *Appl Microbiol*  
948 *Biotechnol* 104:4795-4810.

- 949 60. Rozen DE, Schneider D, Lenski RE. 2005. Long-term experimental evolution in  
950 *Escherichia coli*. XIII. Phylogenetic history of a balanced polymorphism. *J Mol*  
951 *Evol* 61:171–180.
- 952 61. Grosskopf T, Consuegra J, Gaffé J, Willison J, Lenski RE, Soyer OS, Schneider  
953 D. 2016. Metabolic modelling in a dynamic evolutionary framework predicts  
954 adaptive diversification of bacteria in a long-term evolution experiment. *BMC Evol*  
955 *Biol* 16:163.
- 956 62. van Dijk B, Meijer J, Cuypers TD, Hogeweg P. 2019. Trusting the hand that  
957 feeds: microbes evolve to anticipate a serial transfer protocol as individuals or  
958 collectives. *BMC Evol Biol* 19:201.
- 959 63. Raskin DM, de Boer PA. 1999a. Rapid pole-to-pole oscillation of a protein  
960 required for directing division to the middle of *Escherichia coli*. *Proc Natl Acad*  
961 *Sci U S A* 96:4971–4976.
- 962 64. Raskin DM, de Boer PA. 1999b. MinDE-dependent pole-to-pole oscillation of  
963 division inhibitor MinC in *Escherichia coli*. *J Bacteriol* 181:6419–6424.
- 964 65. Huang KC, Meir Y, Wingreen NS. 2003. Dynamic structures in *Escherichia coli*:  
965 Spontaneous formation of MinE rings and MinD polar zones. *Proc Natl Acad Sci*  
966 *U S A* 100:12724–12728.
- 967 66. Lutkenhaus J. 2007. Assembly dynamics of the bacterial MinCDE system and  
968 spatial regulation of the Z ring. *Annu Rev Biochem* 76:539–562.

- 969 67. Dajkovic A, Lan G, Sun SX, Wirtz D, Lutkenhaus J. 2008. MinC spatially controls  
970 bacterial cytokinesis by antagonizing the scaffolding function of FtsZ. *Curr Biol*  
971 18:235–244.
- 972 68. Arumugam S, Petrašek Z, Schwille P. 2014. MinCDE exploits the dynamic nature  
973 of FtsZ filaments for its spatial regulation. *Proc Natl Acad Sci U S A* 111:E1192-  
974 E1200.
- 975 69. Ramm B, Heermann T, Schwille P. 2019. The *E. coli* MinCDE system in the  
976 regulation of protein patterns and gradients. *Cell Mol Life Sci* 76:4245–4273.
- 977 70. Fischer-Friedrich E, Meacci G, Lutkenhaus J, Chaté H, Kruse K. 2010. Intra- and  
978 intercellular fluctuations in Min-protein dynamics decrease with cell length. *Proc*  
979 *Natl Acad Sci U S A* 107:6134–6139.
- 980 71. Minton AP. 2006. How can biochemical reactions within cells differ from those in  
981 test tubes? *J Cell Sci* 119:2863–2869.
- 982 72. Gallet R, Violle C, Fromin N, Jabbour-Zahab R, Enquist BJ, Lenormand R. 2017.  
983 The evolution of bacterial cell size: the internal diffusion-constraint  
984 hypothesis. *ISME J* 11:1559-1568.
- 985 73. Beveridge TJ. 1988. The bacterial surface: general considerations towards  
986 design and function. *Can J Microbiol* 34:363–372.
- 987 74. Koch AL. 1996. What size should a bacterium be? A question of scale. *Annu Rev*  
988 *Microbiol* 50:317–348.
- 989 75. Schulz H, Jorgensen B. 2001. Big bacteria. *Annu Rev Microbiol* 55:105–137.



- 990 76. Golding I, Cox EC. 2006. Physical nature of bacterial cytoplasm. *Phys Rev Lett*  
991 96:98–102.
- 992 77. Beg QK, Vazquez A, Ernst J, de Menezes MA, Bar-Joseph Z, Barabási A-L,  
993 Oltvai ZN. 2007. Intracellular crowding defines the mode and sequence of  
994 substrate uptake by *Escherichia coli* and constrains its metabolic activity. *Proc*  
995 *Natl Acad Sci U S A* 104:12663–12668.
- 996 78. Ando T, Skolnick J. 2010. Crowding and hydrodynamic interactions likely  
997 dominate in vivo macromolecular motion. *Proc Natl Acad Sci U S A* 107:18457–  
998 18462.
- 999 79. Dill KA, Ghosh K, Schmit JD. 2011. Physical limits of cells and proteomes. *Proc*  
1000 *Natl Acad Sci U S A* 108: 17876–17882.
- 1001 80. Don M. 2003. The Coulter principle: foundation of an industry. *JALA* 8:72–81.
- 1002 81. Jeong H, Barbe V, Lee CH, Vallenet D, Yu DS, Choi S-H, Couloux A, Lee S-W,  
1003 Yoon SH, Cattolico L, Hur C-G, Park H-S, Ségurens B, Kim SC, Oh TK, Lenski  
1004 RE, Studier FW, Daegelen P, Kim JF. 2009. Genome sequences of *Escherichia*  
1005 *coli* B strains REL606 and BL21(DE3). *J Mol Biol* 394:644–652.
- 1006 82. Sliusarenko O, Heinritz J, Emonet T, Jacobs-Wagner C. 2011. High-throughput,  
1007 subpixel precision analysis of bacterial morphogenesis and intracellular spatio-  
1008 temporal dynamics. *Mol Microbiol* 80:612–627.

1009
